# Supplementary material
Source: publisher figshare collection journal article supplement (https://gsapubs.figshare.com/articles/dataset/_/18819686)
Supplement: Supplementary file 1 [file 1]

## Sheet: Table S4
Table S4 Modeling results from pMELTS calculation of Initial Composition A under a constant fO2 of QFM + 1 and 3 wt% initial water content
Thickness (Km)	Pressure (GPa)	fO2	Starting composition	Melt fraction (wt%)	T (℃)	Mineral assemblages (wt%)							Fe fractionated (Femineral/Fecumulate)						Mlel compositions
						Grt	Cpx	Opx	Bt	Ol	Pl	Mag	Grt	Cpx	Opx	Bt	Ol	Mag	SiO2 (wt%)	FeOT (wt%)	MgO (wt%)	Sm/Yb	δ56Fe (‰)
65	2	QFM + 1	Initial Composition A	100	1344.7														53.74	8.22775	7.66888	2	0.05
				90	1312.64	0.742299	9.93867						0.0937194	0.906281					54.3619	7.26806	7.78201	2.08103	0.057004
				80	1288.59	5.98004	14.7429						0.366339	0.633661					55.6155	6.17033	7.62424	2.82833	0.0691711
				70	1260.53	10.9523	18.9282						0.460668	0.539332					57.1739	5.06577	7.23251	3.92384	0.085553
				60	1216.44	16.9683	23.3677						0.532372	0.467628					59.6891	3.67804	6.27726	6.16848	0.116667
				50	1148.3	23.2311	27.3419						0.597405	0.402595					63.2921	2.21261	4.4498	10.7249	0.179757
61.75	1.9	QFM + 1	Initial Composition A	100	1333.2	0	0												53.7395	8.22767	7.66881	2	0.05
				90	1301.09	0	10.1684						0	1					54.2581	7.31834	7.79716	1.99786	0.0563326
				80	1277	3.08759	16.163						0.213482	0.786518					55.2165	6.36445	7.70884	2.38564	0.0662018
				70	1244.88	9.18465	20.7584						0.395996	0.604004					57.006	5.07042	7.26181	3.51775	0.085268
				60	1200.72	15.5375	24.8588						0.496444	0.503556					59.5389	3.66854	6.2799	5.60884	0.117377
				50	1132.48	22.1501	28.4561						0.578385	0.421615					63.1534	2.19555	4.41916	9.91849	0.182694
58.5	1.8	QFM + 1	Initial Composition A	100	1321.48	0	0												53.739	8.22759	7.66874	2	0.05
				90	1289.34	0	10.027						0	1					54.2369	7.31868	7.79788	1.99789	0.0563098
				80	1257.19	1.84142	18.867						0.122362	0.877638					55.2364	6.21443	7.7152	2.22146	0.0674381
				70	1229.06	7.38749	22.532						0.327475	0.672525					56.8218	5.08101	7.29517	3.14702	0.0847863
				60	1184.85	14.0972	26.2977						0.459354	0.540646					59.3726	3.66406	6.28838	5.09423	0.117904
				50	1120.56	20.7568	29.3795						0.554825	0.445175					62.8061	2.25039	4.50613	8.90704	0.180905
55.25	1.7	QFM + 1	Initial Composition A	100	1309.38	0	0												53.7384	8.22751	7.66866	2	0.05
				90	1277.23	0	9.92222						0	1					54.2183	7.31616	7.79894	1.99791	0.0563146
				80	1245.09	0	19.6438						0	1					54.9633	6.33574	7.77106	1.99564	0.0654045
				70	1212.95	5.55845	24.2766						0.253872	0.746128					56.6246	5.09287	7.33043	2.8097	0.0841542
				60	1168.75	12.6436	27.7007						0.420631	0.579369					59.1923	3.66224	6.30081	4.62147	0.118289
				50	1104.46	19.6686	30.424						0.53454	0.46546					62.6385	2.24077	4.48937	8.22761	0.18342
52	1.6	QFM + 1	Initial Composition A	100	1297.07	0	0	0											53.7356	8.22741	7.66857	2	0.05
				90	1264.98	0	9.78107	0					0	0.989982	0.0100178				54.014	7.31774	7.79986	1.99795	0.0562918
				80	1228.89	0	20.335	0.161253					0.14612	0.81629	0.0375907				54.5813	6.19894	7.75463	1.99546	0.0667128
				70	1196.8	3.06884	25.5349	0.905527					0.378732	0.621268	0				55.6019	5.03578	7.37186	2.40829	0.0827489
				60	1152.68	11.1219	29.067	0					0.513139	0.486861	0				57.7522	3.67017	6.32448	4.17166	0.118266
				50	1088.51	18.5476	31.4277	0											60.5075	2.2396	4.48716	7.576	0.185423
48.75	1.5	QFM + 1	Initial Composition A	100	1284.57	0	0	0											53.7371	8.22731	7.66848	2	0.05
				90	1252.52	0	9.62426	0					0	1	0				54.1769	7.32154	7.80077	1.99798	0.0562565
				80	1216.47	0	19.7352	0.570142					0	0.964088	0.0359115				54.9788	6.14586	7.75136	1.99821	0.0668359
				70	1176.41	0.573161	26.5949	2.94496					0.0275955	0.84907	0.123335				56.1839	4.7437	7.34118	2.08037	0.0832914
				60	1136.35	8.5851	29.7246	1.51882					0.301987	0.652538	0.0454748				58.6401	3.56698	6.34298	3.53227	0.117207
				50	1072.26	16.9408	32.2434	0					0.484848	0.514782	0				62.4306	2.16258	4.51956	6.75511	0.186875
45.5	1.4	QFM + 1	Initial Composition A	100	1271.68		0	0											53.7364	8.2272	7.66838	2	0.05
				90	1239.71		9.49557	0						1	0				54.158	7.32331	7.80198	1.99801	0.0562427
				80	1203.74		19.1467	0.982296						0.937331	0.0626688				54.9369	6.0912	7.74731	2.00022	0.0669906
				70	1163.77		26.0768	3.5933						0.845614	0.154386				56.0532	4.7011	7.35496	2.0113	0.0828426
				60	1115.81	13.8672	30.4054	3.393					0.226796	0.669893	0.103311				58.4891	3.34066	6.25809	3.06185	0.119208
				50	1059.86	15.5983	32.9475	0	1.78097				0.447047	0.55218	0	0.000772905			62.1879	2.16552	4.68384	5.85392	0.182741
42.25	1.3	QFM + 1	Initial Composition A	100	1258.59	0	0	0											53.7356	8.22707	7.66827	2	0.05
				90	1226.71	0	9.33665	0					0	1	0				54.1379	7.32882	7.80307	1.99804	0.0562047
				80	1190.83	0	18.5409	1.38679					0	0.910295	0.0897051				54.8927	6.04065	7.74331	2.0022	0.0671267
				70	1146.99	0	26.0085	4.22089					0	0.821081	0.178919				56.1177	4.53445	7.29493	2.01443	0.0849894
				60	1095.17	3.9755	31.0477	5.31106					0.1451	0.689627	0.165274				58.311	3.13174	6.18394	2.63071	0.120713
				50	1039.37	13.2446	33.5169	0.523289	2.89206				0.40973	0.575288	0.0135907	0.00139167			62.3356	1.9905	4.625	5.22015	0.187718
39	1.2	QFM + 1	Initial Composition A	100	1245.06														53.7347	8.22694	7.66815	2	0.05
				90	1212.97	0	9.32113	0	0			0	0	1	0	0		0	54.1261	7.32069	7.80546	1.99805	0.0562813
				80	1176.87	0	18.0957	1.83977	0			0	0	0.880675	0.119325	0		0	54.8678	5.96151	7.73411	2.00437	0.0675587
				70	1132.75	0	25.5343	4.66899	0			0	0	0.800946	0.199054	0		0	56.0975	4.45751	7.27241	2.01674	0.0859284
				60	1076.59	0	31.7234	7.32356	0			0.852827	0	0.649975	0.21346	0		0.136564	58.3674	2.97641	5.71756	2.03145	0.107032
				50	1024.45	10.2161	33.819	1.59446	3.54537			0.400188	0.319692	0.579888	0.0420207	0.00171325		0.0566863	62.1645	1.92606	4.51349	4.19775	0.175519
35.75	1.1	QFM + 1	Initial Composition A	100	1231.48														53.7338	8.2268	7.66802	2	0.05
				90	1195.53	0	10.1923	0.199998	0			0	0	0.97444	0.0255599	0		0	54.1687	7.17415	7.81211	1.99872	0.0573134
				80	1163.57	0	17.4642	2.22706	0			0	0	0.853325	0.146675	0		0	54.8202	5.91869	7.72998	2.00628	0.0676711
				70	1119.62	0	24.8702	5.02863	0			0	0	0.782459	0.217541	0		0	56.0366	4.42422	7.26916	2.01863	0.0862553
				60	1059.69	0	31.4132	7.0761	0.468198			1.37961	0	0.592749	0.194061	0.000180956		0.213009	58.8255	2.84668	5.33092	2.03318	0.102484
				50	999.761	8.12157	34.4665	1.71195	4.77831			1.07688	0.249166	0.557898	0.0439993	0.00219486		0.146742	62.7437	1.728	4.03217	3.6354	0.167119
32.5	1	QFM + 1	Initial Composition A	100	1218.24														53.7328	8.22665	7.66788	2	0.05
				90	1182.39	0	9.4485	0	0	0.458858		0	0	0.914438	0	0	0.0855623	0	54.2011	7.1069	7.78531	1.99824	0.0569142
				80	1146.54	0	17.5167	2.829	0			0	0	0.819357	0.180643	0	0	0	54.8564	5.75032	7.70355	2.00905	0.0690816
				70	1102.72	0	24.7127	5.48982	0			0.229792	0	0.721024	0.223703	0	0	0.055273	56.2311	4.2768	7.06169	2.02128	0.0864264
				60	1046.96	0	30.7809	6.42307	1.21205			1.81603	0	0.552104	0.170532	0.000431544	0	0.276932	59.1441	2.80753	5.10722	2.03387	0.0956641
				50	979.245	5.08436	34.9306	2.36061	5.6594			1.84474	0.153826	0.53928	0.0594374	0.0024207	0	0.245035	62.9284	1.61749	3.67528	2.93058	0.146012
29.25	0.9	QFM + 1	Initial Composition A	100	1213.69														53.7321	8.22655	7.66779	2	0.05
				90	1165.49		8.48578	0	0		0	0		0.692385	0	0	0.307615	0	54.42	6.61633	7.68452	1.99915	0.057345
				80	1129.35		17.635	0.590483	0		0	0		0.783492	0.0363783	0	0.180129	0	55.2569	5.47306	7.57489	1.99983	0.0687006
				70	1089.18		24.1018	5.54756	0		0	0.800325		0.620064	0.202626	0	0	0.17731	56.5354	4.22637	6.68017	2.02238	0.0816335
				60	1032.95		30.2313	5.72711	2.02888		0	2.26999		0.512752	0.146721	0.000662161	0	0.339864	59.5107	2.74981	4.8565	2.0347	0.0882911
				50	972.706		32.8791	4.32644	6.28347		3.49984	3.07922		0.485811	0.105751	0.00237163	0	0.406066	62.5686	1.73485	3.67457	2.06107	0.0933762
26	0.8	QFM + 1	Initial Composition A	100	1208.79														53.7314	8.22643	7.66768	2	0.05
				90	1152.68		6.27354	0	0	3.24156	0	0		0.487095	0	0	0.512905	0	54.5362	6.28325	7.57209	2.00028	0.0566671
				80	1112.6		16.7054	0	0	3.61863	0	0		0.692283	0	0	0.307717	0	55.5679	5.08134	7.41904	1.99817	0.069119
				70	1072.53		23.9643	2.56866	0	2.30463	0	1.29055		0.542818	0.0844941	0	0.110179	0.262508	57.3167	3.99317	6.17683	2.00964	0.0753909
				60	1020.43		29.5145	5.06828	2.72505	0	0	2.69828		0.475301	0.125612	0.000808426	0	0.398279	59.7808	2.7343	4.64733	2.03511	0.0799126
				50	972.333		29.9036	4.15679	6.66207	0	6.13794	3.57989		0.424004	0.098496	0.0022226	0	0.475277	62.5734	1.91533	3.77312	2.07103	0.0738416
22.75	0.7	QFM + 1	Initial Composition A	100	1203.94														53.7306	8.22631	7.66757	2	0.05
				90	1135.95		5.14504	0	0	4.55631	0	0		0.351342	0	0	0.648658	0	54.7126	5.84968	7.45348	2.00117	0.0569994
				80	1099.95		14.7329	0	0	4.76354	0	0		0.595715	0	0	0.404285	0	55.6787	4.82201	7.29804	1.99921	0.0685319
				70	1055.96		23.3549	0	0	4.64788	0	1.67689		0.475617	0	0	0.205258	0.319125	58.034	3.70935	5.71431	1.99904	0.0694817
				60	1003.97		29.107	4.29982	3.65657	0	0	3.17799		0.439431	0.102357	0.000984413	0	0.457228	60.2238	2.64611	4.35348	2.03615	0.0709624
				50	971.973		27.3695	3.99063	6.91952	0	8.05346	4.00752		0.372388	0.0914457	0.00202145	0	0.534145	62.5381	2.1094	3.84873	2.07792	0.0575757
19.5	0.6	QFM + 1	Initial Composition A	100	1198.75														53.7297	8.22618	7.66746	2	0.05
				90	1119		3.99047	0	0	5.82279	0	0		0.243795	0	0	0.756205	0	54.8758	5.43785	7.32595	2.00204	0.0573485
				80	1083.11		13.7111	0	0	5.88232	0	0.0853376		0.505632	0	0	0.464934	0.0294346	55.9505	4.46492	7.08099	2.00012	0.0688215
				70	1039.25		22.3012	0	0	5.45656	0	2.06909		0.40842	0	0	0.222843	0.368737	58.4704	3.43045	5.28767	2.00021	0.0653591
				60	995.386		26.7145	1.92252	4.21324	1.74102	2.54497	3.57278		0.383314	0.0444926	0.00103809	0.0588712	0.512284	60.7671	2.68929	4.26129	2.03476	0.056381
				50	971.461		25.1526	3.60096	7.06236	0.182642	9.41626	4.37259		0.328534	0.0797367	0.0017967	0.00596439	0.583968	62.4916	2.31189	3.90146	2.08099	0.0436974
16.25	0.5	QFM + 1	Initial Composition A	100	1193.55														53.7289	8.22604	7.66733	2	0.05
				90	1101.19		3.00109	0	0	7.04139	0	0		0.164844	0	0	0.835156	0	55.0401	5.0308	7.1891	2.00285	0.0579021
				80	1065.05		13.0811	0	0	6.72635	0	0.763491		0.371491	0	0	0.418948	0.209561	56.5703	4.09178	6.47749	2.00146	0.0645506
				70	1020.87		21.4809	0	0	6.18943	0	2.4785		0.35351	0	0	0.233395	0.413095	58.9311	3.14343	4.83282	2.00129	0.0607689
				60	988.745		23.5955	0	4.21991	3.92594	5.37511	3.83377		0.322663	0	0.000977584	0.129371	0.546989	61.2634	2.68055	4.17305	2.03416	0.0442036
				50	964.65		23.0528	1.45503	7.38694	1.78187	11.6749	4.74702		0.285117	0.0311508	0.00168191	0.0557984	0.626252	63.0784	2.38073	3.80619	2.07871	0.0274109
13	0.4	QFM + 1	Initial Composition A	100	1188.18														53.7279	8.2259	7.6672	2	0.05
				90	1084.13		1.667		0	8.22858	0	0		0.0849258		0	0.915074	0	55.1637	4.67179	7.0474	2.00372	0.0581459
				80	1052.12		11.0741		0	7.62402	0	1.12857		0.282193		0	0.43272	0.285087	56.8145	3.87036	6.12506	2.00278	0.0603971
				70	1008.1		19.415		0	7.06397	0.759879	2.75533		0.299454		0	0.254938	0.445608	59.1948	2.97478	4.57133	2.00432	0.0553527
				60	984.086		20.3233		3.81368	5.18293	7.17424	3.96511		0.267479		0.000836683	0.167526	0.564158	61.36	2.65309	4.10401	2.03841	0.0376667
				50	956.073		20.7285		7.52186	3.35614	13.9421	5.04263		0.242275		0.00158409	0.101719	0.654422	63.6999	2.34889	3.65297	2.07961	0.0138117
9.75	0.3	QFM + 1	Initial Composition A	100	1182.7														53.7269	8.22575	7.66706	2	0.05
				90	1067.09		0.217541		0	9.37785	0	0		0.0104815		0	0.989519	0	55.2552	4.34	6.90368	2.00459	0.0582625
				80	1035.2		9.913		0	8.42012	0	1.6673		0.215582		0	0.41482	0.369599	57.2556	3.57515	5.62963	2.00405	0.0553493
				70	999.321		15.861		0	8.26838	3.36542	3.06181		0.230846		0	0.286757	0.482396	59.5401	2.87184	4.40716	2.0122	0.0476518
				60	979.389		17.1682		3.2068	6.50292	8.45847	4.0657		0.21818		0.000660575	0.205755	0.575404	61.3755	2.61501	4.01053	2.04021	0.0322907
				50	951.484		18.1806		7.15715	4.3358	15.0401	5.172		0.203881		0.00141008	0.128342	0.666367	63.7973	2.32457	3.55933	2.08182	0.00721356
6.5	0.2	QFM + 1	Initial Composition A	100	1177.21														53.7258	8.22559	7.66691	2	0.05
				90	1056.83		0		0	9.66044	0	0.368805		0		0	0.853395	0.146605	55.5095	4.19524	6.64017	2.00517	0.0558122
				80	1016.7		8.7681		0	9.25007	0.654441	2.28299		0.162053		0	0.394439	0.443507	57.8282	3.26823	5.10166	2.00686	0.0488355
				70	992.62		12.2441		0	9.34938	5.11653	3.3044		0.171674		0	0.315814	0.512512	59.6905	2.80888	4.29173	2.01792	0.0406146
				60	968.542		14.4371		3.46537	7.27865	10.8214	4.4294		0.171751		0.000656045	0.220689	0.606904	61.8772	2.50407	3.79558	2.04932	0.0221855
				50	940.452		15.9425		7.40058	4.93919	17.0595	5.47785		0.168011		0.00134706	0.141257	0.689384	64.338	2.23125	3.35543	2.09091	-0.00443425
Abbreviations: Grt = garnet, Cpx = clinopyroxene, Opx = orthopyroxene, Bt = biotite, Ol = olivine, Pl = plagioclase, Mag = magnetite.

## Sheet: Table S5
Table S5 Modeling results from pMELTS calculation of Initial Composition A under a constant fO2 of QFM and 3 wt% initial water content
Thickness (Km)	Pressure (GPa)	fO2	Starting composition	Melt fraction (wt%)	T (℃)	Mineral assemblages (wt%)							Fe fractionated (Femineral/Fecumulate)						Mlel compositions
						Grt	Cpx	Opx	Bt	Ol	Pl	Mag	Grt	Cpx	Opx	Bt	Ol	Mag	SiO2 (wt%)	FeOT (wt%)	MgO (wt%)	Sm/Yb	δ56Fe (‰)
66	2	QFM	Initial Composition A	100	1339.65	0	0												53.7669	8.23188	7.67263	2	0.05
				90	1315.67	3.56855	6.77643						0.469217	0.530783					54.531	7.21028	7.73753	2.43096	0.0581249
				80	1291.69	8.8949	11.5497						0.572234	0.427766					55.7477	6.10094	7.57862	3.35119	0.0706513
				70	1263.71	13.9099	15.7632						0.614263	0.385737					57.27	4.99374	7.18634	4.70893	0.0875092
				60	1219.74	19.8887	20.3495						0.652167	0.347833					59.7598	3.6166	6.21998	7.49352	0.119643
				50	1155.8	25.668	24.4211						0.689966	0.310034					63.1921	2.24392	4.46381	12.7108	0.180755
62.7	1.9	QFM	Initial Composition A	100	1328.12	0	0												53.7666	8.23182	7.67258	2	0.05
				90	1300.12	1.25384	9.14191						0.186294	0.813706					54.312	7.21187	7.8234	2.14039	0.0567761
				80	1276.11	6.8527	13.6716						0.464655	0.535345					55.5418	6.09218	7.6518	2.97538	0.0696597
				70	1248.11	12.1302	17.6381						0.55357	0.44643					57.0809	4.97654	7.24004	4.21982	0.0870392
				60	1204.1	18.4288	21.9007						0.617921	0.382079					59.5946	3.59282	6.2387	6.80334	0.120251
				50	1140.08	24.5271	25.6197						0.670796	0.329204					63.0444	2.22018	4.44081	11.7131	0.183576
59.4	1.8	QFM	Initial Composition A	100	1316.61	0	0												53.7662	8.23176	7.67253		0.05
				90	1288.57	0	9.561						0	1					54.1435	7.29294	7.85749	1.99799	0.0554686
				80	1260.53	4.71853	15.7103						0.340893	0.659107					55.3126	6.09933	7.72953	2.62671	0.0683492
				70	1232.49	10.2905	19.4418						0.4876	0.5124					56.8687	4.97234	7.30069	3.76507	0.086253
				60	1192.43	16.4245	23.1062						0.575931	0.424069					59.1776	3.68793	6.37333	5.91235	0.117104
				50	1124.33	23.386	26.7685						0.651192	0.348808					62.8794	2.20218	4.42602	10.7849	0.186164
56.1	1.7	QFM	Initial Composition A	100	1316.61	0	0												53.766	8.23173	7.6725	2	0.05
				90	1276.55	0	9.48834						0	1					54.1287	7.28851	7.85528	1.99801	0.055515
				80	1244.51	2.56325	17.7503						0.197893	0.802107					55.0802	6.10215	7.80658	2.3165	0.0669482
				70	1216.47	8.44225	21.232						0.415733	0.584267					56.6531	4.96602	7.36084	3.35761	0.0853939
				60	1176.41	14.9132	24.598						0.536364	0.463636					58.9845	3.67401	6.40394	5.34728	0.117258
				50	1108.31	22.2568	27.8826						0.63114	0.36886					62.7076	2.1859	4.41298	9.93567	0.188774
52.8	1.6	QFM	Initial Composition A	100	1292.58	0	0						0						53.7653	8.23163	7.67241	2	0.05
				90	1264.54	0	9.33208						0	1					54.1101	7.29327	7.85203	1.99804	0.0555037
				80	1228.48	0.134362	19.5896						0.0114811	0.988519					54.7993	6.09638	7.88825	2.01235	0.0650624
				70	1200.44	6.48802	22.981						0.33398	0.66602					56.4075	4.97151	7.42817	2.97397	0.0841451
				60	1156.38	13.9195	26.2841						0.503467	0.496533					58.9982	3.55885	6.33137	5.02991	0.120723
				50	1092.28	21.1103	28.9575						0.610151	0.389849					62.5138	2.17587	4.40994	9.13526	0.191042
49.5	1.5	QFM	Initial Composition A	100	1280.27	0	0						0						53.7648	8.23155	7.67234	2	0.05
				90	1248.25	0	10.4544						0	1					54.1539	7.16302	7.86573	1.99779	0.0564242
				80	1216.23	0	18.9396						0	0.94425					54.7389	6.04466	7.88008	1.9993	0.065073
				70	1180.2	4.81518	24.5285						0.249604	0.711373					56.3124	4.75857	7.4154	2.69218	0.0852393
				60	1140.17	12.3274	27.6972						0.458797	0.541203					58.7597	3.55757	6.37432	4.51833	0.120351
				50	1076.13	19.7849	29.9066						0.586825	0.412981					62.3818	2.13785	4.42797	8.30654	0.192876
46.2	1.4	QFM	Initial Composition A	100	1267.57	0	0	0	0				0		0				53.7643	8.23147	7.67226	2	0.05
				90	1235.61	0	10.3163	0	0				0	1	0				54.1352	7.16587	7.86301	1.99783	0.0564395
				80	1203.65	0	18.2858	1.24691	0				0	0.908751	0.0912493				54.6983	5.98973	7.86643	2.00162	0.0652877
				70	1163.69	1.63954	25.0277	2.93144	0				0.0911259	0.770842	0.138032				55.8877	4.6096	7.50096	2.22173	0.0823206
				60	1123.74	9.79315	28.1791	1.63959	0				0.378755	0.567812	0.0534329				58.3803	3.44176	6.41575	3.82645	0.118812
				50	1063.81	17.8484	30.5955	0	1.21157				0.553769	0.445526	0	0.000704864			62.1324	2.12929	4.60061	7.2042	0.188649
42.9	1.3	QFM	Initial Composition A	100	1254.49	0	0	0	0				0		0	0			53.7637	8.23138	7.67218	2	0.05
				90	1222.63	0	10.198	0	0				0	1	0	0			54.118	7.1673	7.86074	1.99785	0.0564702
				80	1186.78	0	18.4472	1.9542	0				0	0.862997	0.137003	0			54.7406	5.78816	7.83701	2.00484	0.0668179
				70	1142.97	0	25.7709	4.56059	0				0	0.783672	0.216328	0			55.807	4.33394	7.46689	2.01618	0.0834496
				60	1103.14	7.71742	28.7543	3.43796	0				0.304046	0.58118	0.114774	0			58.2102	3.22111	6.34572	3.35438	0.120719
				50	1047.37	16.187	31.301	0	2.23926				0.523129	0.475434	0	0.00143702			62.1074	2.04465	4.67464	6.41294	0.188979
39.6	1.2	QFM	Initial Composition A	100	1241.21	0	0	0	0				0		0	0			53.7631	8.23128	7.67209	2	0.05
				90	1209.11	0	9.72169	0.480223	0				0	0.931828	0.0681719	0			54.0933	7.09553	7.8489	2.00003	0.0567054
				80	1172.99	0	17.9284	2.46165	0				0	0.827174	0.172826	0			54.7132	5.71109	7.81859	2.00728	0.0673148
				70	1128.85	0	25.2309	5.081	0				0	0.757904	0.242096	0			55.7883	4.25727	7.43125	2.01887	0.0845069
				60	1084.71	5.09436	29.1746	5.35896	0				0.208142	0.60496	0.186898	0			57.8723	3.07063	6.36011	2.83052	0.119579
				50	1028.54	14.3944	31.7268	0.609639	3.20699				0.482829	0.497303	0.0175681	0.00229992			62.1133	1.90301	4.6749	5.67063	0.191601
36.3	1.1	QFM	Initial Composition A	100	1227.6	0	0	0	0				0		0	0			53.7624	8.23118	7.672	2	0.05
				90	1195.63	0	9.13441	0.969198	0				0	0.862454	0.137546	0			54.0632	7.0336	7.83467	2.00226	0.0568802
				80	1159.67	0	17.2677	2.92096	0				0	0.792827	0.207173	0			54.6706	5.66186	7.80247	2.00953	0.0675914
				70	1115.72	0	24.5257	5.5229	0				0	0.733742	0.266258	0			55.7374	4.21881	7.41057	2.02118	0.0850619
				60	1063.78	2.82701	29.7	7.11399	0.145092				0.118613	0.624126	0.257146	0.000114284			57.691	2.87202	6.31776	2.44855	0.120426
				50	1011.83	12.1735	31.9768	1.59305	3.96052				0.426042	0.522018	0.0487588	0.00318197			61.8911	1.80545	4.74866	4.8452	0.190148
33	1	QFM	Initial Composition A	100	1222.92	0	0	0	0	0			0	0	0	0			53.7619	8.2311	7.67193	2	0.05
				90	1179.05	0	8.75665	0	0	1.68274			0	0.686412	0	0	0.313588		54.3483	6.64547	7.71799	1.99899	0.0569791
				80	1147.15	0	16.4621	2.2243	0	0.79166			0	0.752733	0.159526	0	0.0877409		54.7573	5.60552	7.74055	2.0069	0.0668936
				70	1103.28	0	23.6949	5.90181	0	0			0	0.710513	0.289487	0	0		55.6622	4.21028	7.40193	2.02318	0.0852083
				60	1043.46	0.618923	30.2599	7.91789	1.27941	0			0.0273245	0.664979	0.30654	0.00115573	0		57.6821	2.66804	6.38655	2.1255	0.119559
				50	991.61	10.3389	32.3079	2.35701	4.88262	0			0.37522	0.544077	0.0762894	0.00441402	0		61.8839	1.66437	4.7295	4.27022	0.193087
29.7	0.9	QFM	Initial Composition A	100	1218.2	0	0	0	0	0			0	0	0	0			53.7614	8.23102	7.67186	2	0.05
				90	1166.46	0	6.46913	0	0	3.14829			0	0.454094	0	0	0.545906		54.5077	6.30654	7.56582	2.0002	0.0565066
				80	1126.66	0	16.772	0	0	3.42594			0	0.661168	0	0	0.338832		55.3595	5.09537	7.49263	1.99805	0.0675877
				70	1082.88	0	24.0185	4.51322	0	1.6269			0	0.669892	0.211399	0	0.118709		56.1435	3.90301	7.15512	2.01727	0.0873508
				60	1027.16	0	30.0225	7.98619	2.17498	0			0	0.674847	0.323037	0.00211638	0		57.7695	2.55759	6.4214	2.04464	0.120156
				50	971.441	8.32461	31.7542	3.26054	5.74014	0			0.313539	0.556059	0.111947	0.00586655	0		61.834	1.53575	4.72229	3.71212	0.194968
26.4	0.8	QFM	Initial Composition A	100	1213.52			0	0	0	0				0	0		0	53.7608	8.23094	7.67178	2	0.05
				90	1149.24		5.49584	0	0	4.55866	0			0.320342	0	0	0.679658	0	54.7242	5.84444	7.41253	2.0011	0.0571802
				80	1113.09		14.9486	0	0	4.70742	0			0.549754	0	0	0.450246	0	55.5417	4.80149	7.32171	1.99914	0.0675197
				70	1060.86		24.5849	0.576192	0	5.1149	0			0.624379	0.0253707	0	0.35025	0	57.0602	3.50151	6.72776	1.99982	0.0877594
				60	1012.65		29.4586	7.15829	2.87433	0.520493	0			0.66597	0.297161	0.00289699	0.0339712	0	57.9884	2.47669	6.39006	2.0439	0.120461
				50	972.482		29.9883	7.66169	6.12913	0	5.01728	1.80459		0.595225	0.297358	0.00729545	0	0.100122	60.1063	1.77382	5.71819	2.08114	0.138381
23.1	0.7	QFM	Initial Composition A	100	1208.63			0		0	0	0			0	0		0	53.7602	8.23085	7.6717	2	0.05
				90	1132.49		4.31156	0		5.9092	0	0		0.216646	0	0	0.783354	0	54.9162	5.42709	7.24662	2.00202	0.0577519
				80	1096.43		13.8307	0		5.95234	0	0		0.463629	0	0	0.536371	0	55.7889	4.44385	7.12067	2.00004	0.0685404
				70	1044.33		23.51	0		6.62767	0	0		0.559258	0	0	0.440742	0	57.4437	3.22493	6.45448	1.99811	0.0889804
				60	996.247		29.0656	4.96227	3.43602	2.19802	0	0		0.645028	0.207197	0.00351464	0.14426	0	58.4981	2.33828	6.19346	2.03586	0.119917
				50	968.196		27.0032	6.64679	6.77234	0.494279	8.15992	1.38422		0.506533	0.245957	0.0069894	0.029035	0.211486	60.511	1.90012	5.69338	2.0902	0.117345
19.8	0.6	QFM	Initial Composition A	100	1203.55				0	0	0			0				0	53.7596	8.23075	7.67161	2	0.05
				90	1115.67		3.06035		0	7.21366	0			0.135271			0.864729	0	55.0924	5.03584	7.07025	2.00293	0.0583409
				80	1079.72		12.7085		0	7.14552	0			0.391221			0.608779	0	56.0275	4.1088	6.90742	2.00091	0.0696888
				70	1027.78		22.3673		0	7.73826	0			0.500069			0.499931	0	57.7481	2.96687	6.1854	1.99901	0.0910808
				60	987.834		26.1419		3.52429	6.49347	3.56715	0.26686		0.53856		0.00334585	0.410997	0.0470966	59.5171	2.31762	5.96406	2.02261	0.105488
				50	963.865		24.5662	4.4584	7.08423	2.02694	10.5742	1.934		0.43468	0.156994	0.00629729	0.112981	0.289048	61.0483	2.0077	5.56518	2.08822	0.0981456
16.5	0.5	QFM	Initial Composition A	100	1198.28					0	0	0							53.7589	8.23065	7.67152	2	0.05
				90	1098.79		1.71826			8.48112	0	0		0.0679641			0.932036		55.2498	4.67058	6.88479	2.00384	0.0589232
				80	1062.97		11.5574			8.30185	0	0		0.329094			0.670906		56.2602	3.79567	6.68263	2.00177	0.0709519
				70	1011.23		21.2285			8.79626	0	0		0.447905			0.552095		58.037	2.72831	5.90756	1.99987	0.093426
				60	983.373		22.5177		3.18174	7.99262	5.77768	0.401914		0.433709		0.00283979	0.493297	0.0701543	59.7518	2.29455	5.83825	2.0285	0.0997724
				50	959.494		22.5489		6.73282	5.74535	12.3206	2.12551		0.37827		0.00528631	0.305984	0.31046	61.8216	2.05413	5.31432	2.0675	0.0817963
13.2	0.4	QFM	Initial Composition A	100	1193					0	0								53.7582	8.23054	7.67142	2	0.05
				90	1084.67		0		0	9.60225	0	0		0			1		55.339	4.40138	6.71788	2.00475	0.0589995
				80	1044.55		10.787		0	9.43601	0	0		0.282631			0.717369		56.5557	3.46483	6.42608	2.00255	0.0730539
				70	1004.43		17.7139		0	10.1776	1.86684	0		0.354648			0.645352		58.2277	2.6555	5.845	2.00573	0.0908257
				60	976.349		19.283		3.14045	9.09779	8.19892	0.765131		0.339427		0.00252643	0.530407	0.12764	60.177	2.24176	5.59319	2.03649	0.0924157
				50	952.277		19.7231		6.77163	6.63809	14.5216	2.46699		0.308658		0.00484727	0.338056	0.348439	62.2878	2.01195	5.08548	2.07607	0.0730701
9.9	0.3	QFM	Initial Composition A	100	1187.64					0									53.7582	8.23054	7.67142	2	0.05
				90	1075.74					9.85131	0			0			1		55.3869	4.30031	6.67914	2.00488	0.0594516
				80	1027.79		9.49841			10.5905	0			0.232928			0.767072		56.8233	3.18919	6.17095	2.00344	0.074605
				70	995.816		14.3019			11.6492	4.00976			0.284286			0.715714		58.5346	2.55187	5.74274	2.0123	0.0899362
				60	971.839		16.1803		2.48905	10.4953	9.2963	0.879156		0.278816		0.00178649	0.578471	0.140927	60.28	2.21432	5.38259	2.03767	0.0888345
				50	943.865		17.183		6.86516	7.36745	16.4682	2.84048		0.250769		0.00444691	0.357861	0.386923	62.7756	1.95731	4.82061	2.08417	0.0639768
6.6	0.2	QFM	Initial Composition A	100	1182.12					0									53.7655	8.24766	7.67246	2	0.05
				90	1070.67					9.86413							1		55.3957	4.30568	6.68881	2.0049	0.0594836
				80	1014.94		6.53879			12.1602	1.16411			0.151892			0.848108		57.1503	2.99086	5.9705	2.00743	0.0745241
				70	987.078		10.9107			13.1061	5.68344			0.21032			0.78968		58.8149	2.4533	5.60571	2.01776	0.0886932
				60	963.196		13.1909		2.49884	11.3509	11.1947	1.39929		0.208204		0.00154955	0.579682	0.210565	60.7192	2.14942	5.03142	2.04452	0.0798091
				50	939.314		14.4846		6.37981	8.50122	17.1909	2.99689		0.20033		0.00372098	0.396684	0.399265	62.8808	1.93504	4.59888	2.08457	0.0581976
Abbreviations: Grt = garnet, Cpx = clinopyroxene, Opx = orthopyroxene, Bt = biotite, Ol = olivine, Pl = plagioclase, Mag = magnetite.

## Sheet: Table S6
Table S6 Modeling results from pMELTS calculation of Initial Composition A under a constant fO2 of QFM - 1 and 3 wt% initial water content
Thickness (Km)	Pressure (GPa)	fO2	Starting composition	Melt fraction (wt%)	T(℃）	Mineral assemblages (wt%)						Femineral/Fecumulate					Mlel compositions
						Grt	Cpx	Opx	Bt	Ol	Pl	Grt	Cpx	Opx	Bt	Ol	SiO2 (wt%)	FeOT (wt%)	MgO (wt%)	Sm/Yb	δ56Fe (‰)
66	2	QFM-1	Initial Composition A	100	1337.08	0	0					0	0				53.7863	8.23484	7.67533	2	0.05
				90	1317.03	5.45426	5.04708					0.670244	0.329756				54.7116	7.17467	7.66197	2.70431	0.0597051
				80	1292.97	10.817	9.78316					0.683984	0.316016				55.9187	6.05656	7.48739	3.76195	0.0726698
				70	1264.9	15.8341	13.9856					0.698196	0.301804				57.4284	4.9463	7.0819	5.32713	0.0900594
				60	1224.81	21.2889	18.2769					0.716396	0.283604				59.678	3.68177	6.20474	8.20149	0.119811
				50	1156.64	27.3366	22.8424					0.74296	0.25704				63.3335	2.21461	4.34155	14.4337	0.186003
62.7	1.9	QFM-1	Initial Composition A	100	1325.78	0	0					0	0				53.7861	8.2348	7.6753	2	0.05
				90	1301.68	3.14306	7.347					0.443479	0.556521				54.4701	7.16473	7.76422	2.37851	0.0581646
				80	1277.58	8.78089	11.8601					0.590134	0.409866				55.6909	6.03708	7.5763	3.33884	0.0715114
				70	1249.46	14.0592	15.8363					0.643724	0.356276				57.2194	4.91975	7.14979	4.77285	0.0894547
				60	1209.29	19.8034	19.8533					0.683605	0.316395				59.4958	3.65116	6.23734	7.43568	0.120232
				50	1145.03	25.9026	23.8681					0.722987	0.277013				62.9789	2.25393	4.43605	12.9196	0.184225
59.4	1.8	QFM-1	Initial Composition A	100	1314.24	0	0					0	0				53.7858	8.23476	7.67526	2	0.05
				90	1286.36	0.684054	9.55187					0.116303	0.883697				54.2042	7.17549	7.8694	2.07501	0.0562678
				80	1262.46	6.58349	13.8181					0.478461	0.521539				55.4255	6.04626	7.67396	2.9336	0.0698451
				70	1234.58	12.1188	17.557					0.582419	0.417581				56.956	4.92742	7.23627	4.22604	0.0881142
				60	1190.77	18.6655	21.5973					0.652248	0.347752				59.4647	3.54935	6.19781	6.93162	0.122991
				50	1127.04	24.9085	25.1577					0.705338	0.294662				62.9235	2.19292	4.36045	12.0788	0.184743
56.1	1.7	QFM-1	Initial Composition A	100	1302.47	0	0					0	0				53.7855	8.23472	7.67522	2	0.05
				90	1274.58	0	9.73284					0	1				54.1033	7.21505	7.88843	1.99794	0.0555233
				80	1246.68	4.40663	15.821					0.346332	0.653668				55.1691	6.04183	7.76905	2.5819	0.0682081
				70	1218.79	10.2502	19.3319					0.515139	0.484861				56.7182	4.91508	7.31327	3.76191	0.0870383
				60	1174.96	17.16	23.0725					0.61644	0.38356				59.2561	3.5308	6.23873	6.26567	0.123083
				50	1115.18	23.4342	26.1425					0.682699	0.317301				62.5405	2.24131	4.47158	10.7758	0.18706
52.8	1.6	QFM-1	Initial Composition A	100	1290.39	0	0										53.7852	8.23467	7.67517		0.05
				90	1262.51	0	9.62919					0	1				54.0879	7.21428	7.8832	1.99796	0.0555726
				80	1230.64	2.13914	17.8216					0.1835	0.8165				54.8972	6.0391	7.86532	2.26091	0.0663383
				70	1202.75	8.32318	21.0925					0.438834	0.561166				56.466	4.90585	7.39297	3.33641	0.0857421
				60	1158.93	15.6269	24.5228					0.577788	0.422212				59.0337	3.51603	6.28367	5.65132	0.122982
				50	1095.2	22.5922	27.4086					0.665598	0.334402				62.5462	2.15969	4.35353	10.2012	0.194356
49.5	1.5	QFM-1	Initial Composition A	100	1278.07	0	0										53.7848	8.23462	7.67512		0.05
				90	1250.21	0	9.51375					0	1				54.0722	7.21533	7.87792	1.99798	0.0556152
				80	1214.4	0	18.6542					0	0.914075				54.6295	5.90646	7.93206	2.00095	0.06479
				70	1182.56	7.11057	23.1916					0.376248	0.622892				56.424	4.75336	7.38909	3.10298	0.0872563
				60	1142.76	14.042	25.9561					0.535283	0.464717				58.7913	3.50614	6.33458	5.07787	0.122596
				50	1083.07	21.0588	28.3702					0.639392	0.360608				62.1307	2.21593	4.48085	9.05954	0.191168
46.2	1.4	QFM-1	Initial Composition A	100	1265.46	0	0	0									53.7844	8.23456	7.67507		0.05
				90	1237.34	0	9.49368	0				0	1	0			54.0608	7.20621	7.87434	1.99799	0.055727
				80	1201.2	0	18.0999	1.67799				0	0.871155	0.128845			54.6027	5.82566	7.90949	2.00365	0.0652803
				70	1165.06	4.40131	23.7366	1.90399				0.246142	0.664482	0.0893759			56.0627	4.567	7.45476	2.63261	0.085372
				60	1124.9	12.2513	26.9628	0.790134				0.479548	0.494503	0.0259487			58.5598	3.40362	6.33962	4.51572	0.123086
				50	1064.66	19.6608	29.1677	0				0.617109	0.38222	0			62.2286	2.08502	4.47309	8.25185	0.195136
42.9	1.3	QFM-1	Initial Composition A	100	1252.64	0	0	0	0			0	0	0	0		53.784	8.23449	7.67501	2	0.05
				90	1224.59	0	8.92812	0.452219	0			0	0.926733	0.0732668	0		54.0338	7.15478	7.85825	2.00007	0.0558799
				80	1188.52	0	17.3886	2.1937	0			0	0.830181	0.169819	0		54.5616	5.77389	7.88755	2.00617	0.0655649
				70	1144.44	2.22773	24.5398	3.74457	0			0.12765	0.691157	0.181193	0		55.8668	4.29729	7.4608	2.31172	0.0854578
				60	1108.38	9.64071	27.2592	2.61558	0			0.393865	0.515788	0.0903475	0		58.1442	3.27963	6.39625	3.80391	0.121036
				50	1048.27	18.0496	29.8491	0	2.0105			0.590001	0.408492	0	0.00150693		62.2059	1.99527	4.54645	7.37075	0.195713
39.6	1.2	QFM-1	Initial Composition A	100	1239.37	0	0	0	0			0	0	0	0		53.7836	8.23442	7.67495	2	0.05
				90	1207.43	0	9.36749	1.16365	0			0	0.834849	0.165151	0		54.0504	6.92885	7.85327	2.00309	0.0570721
				80	1171.49	0	17.4952	2.91895	0			0	0.783457	0.216543	0		54.5953	5.57747	7.85274	2.00953	0.0671518
				70	1127.57	0	24.7369	5.3903	0			0	0.72363	0.27637	0		55.5672	4.15587	7.51722	2.02057	0.0835102
				60	1087.65	7.60996	27.7574	4.40644	0			0.317165	0.526221	0.156614	0		57.9581	3.06702	6.33339	3.34306	0.122818
				50	1031.75	16.302	30.371	0.278569	2.93504			0.555425	0.433943	0.00818005	0.0024522		62.1181	1.90541	4.62505	6.51444	0.195621
36.3	1.1	QFM-1	Initial Composition A	100	1230.66	0	0	0	0			0	0	0	0		53.7832	8.23436	7.6749	2	0.05
				90	1194.79	0	8.58148	1.17505	0			0	0.818639	0.181361	0		54.0757	6.87286	7.81047	2.00342	0.0572385
				80	1158.92	0	16.6628	3.38787	0			0	0.744938	0.255062	0		54.5417	5.55126	7.83048	2.01187	0.0672988
				70	1115.08	0	23.916	5.8504	0			0	0.696212	0.303788	0		55.5066	4.13307	7.49224	2.02299	0.0839373
				60	1067.25	5.3801	28.1889	6.26352	0			0.230044	0.539295	0.23066	0		57.719	2.88023	6.29272	2.89686	0.123596
				50	1015.44	14.1557	30.5657	1.24342	3.67266			0.503183	0.454559	0.0388053	0.00345241		61.8829	1.80798	4.70697	5.59164	0.194065
33	1	QFM-1	Initial Composition A	100	1226.21	0	0	0	0			0		0	0		53.7829	8.23431	7.67485	2.00025	0.05
				90	1178.44	0	7.71984	0	0			0	0.52627	0	0	0.47373	54.4471	6.39433	7.6229	1.99964	0.0568836
				80	1142.62	0	16.7384	0.801446	0			0	0.68002	0.0560864	0	0.263894	55.0188	5.27026	7.62394	2.00117	0.0667251
				70	1098.83	0	23.581	6.43111	0			0	0.664471	0.330749	0	0.00478058	55.5481	4.00797	7.4168	2.02602	0.085944
				60	1047.09	3.2808	28.6802	7.11653	1.04294			0.147278	0.571276	0.280333	0.00111263	0	57.6929	2.67251	6.35709	2.53229	0.123069
				50	995.339	12.3554	30.2423	2.01694	4.59607			0.454856	0.465773	0.0665865	0.00488951	0	61.9063	1.65953	4.68292	4.94148	0.197427
29.7	0.9	QFM-1	Initial Composition A	100	1226.21	0	0	0	0			0		0	0		53.7829	8.23431	7.67485	2.00025	0.05
				90	1178.44	0	7.71984	0	0			0	0.52627	0	0	0.47373	54.4471	6.39433	7.6229	1.99964	0.0568836
				80	1142.62	0	16.7384	0.801446	0			0	0.68002	0.0560864	0	0.263894	55.0188	5.27026	7.62394	2.00117	0.0667251
				70	1098.83	0	23.581	6.43111	0			0	0.664471	0.330749	0	0.00478058	55.5481	4.00797	7.4168	2.02602	0.085944
				60	1047.09	3.2808	28.6802	7.11653	1.04294			0.147278	0.571276	0.280333	0.00111263	0	57.6929	2.67251	6.35709	2.53229	0.123069
				50	995.339	12.3554	30.2423	2.01694	4.59607			0.454856	0.465773	0.0665865	0.00488951	0	61.9063	1.65953	4.68292	4.94148	0.197427
26.4	0.8	QFM-1	Initial Composition A	100	1216.64	0	0	0	0	0		0	0	0	0		53.7821	8.2342	7.67474	2.00026	0.05
				90	1148.52	0	4.42635	0	0	5.50832		0	0.214594	0	0	0.785406	54.8484	5.60533	7.25398	2.00181	0.0574294
				80	1112.45	0	13.8926	0	0	5.53238		0	0.454165	0	0	0.545835	55.5913	4.59237	7.18552	1.9998	0.0672473
				70	1060.36	0	23.7401	0	0	6.17276		0	0.549802	0	0	0.450198	57.1064	3.33278	6.60137	1.9978	0.0860984
				60	1008.27	0	29.1507	6.76545	2.84311	1.37719		0	0.589042	0.29325	0.00371617	0.097185	58.0556	2.29402	6.26641	2.04245	0.120579
				50	972.202	3.22265	29.2458	7.01786	5.8968	0.156333		0.140353	0.509702	0.289945	0.00945128	0.010639	60.1479	1.6684	5.76964	2.61328	0.162007
23.1	0.7	QFM-1	Initial Composition A	100	1211.76			0		0	0						53.7817	8.23413	7.67469	2.00026	0.05
				90	1131.81		3.19552	0	0	6.88417	0		0.132088			0.867912	55.0487	5.19914	7.05621	2.00276	0.0581667
				80	1095.84		12.7426	0	0	6.80308	0		0.373683			0.626317	55.8456	4.24579	6.95203	2.00073	0.0684206
				70	1043.87		22.5399	0	0	7.38569	0		0.481206			0.518794	57.4421	3.06512	6.30677	1.99876	0.0880959
				60	995.906		27.744	3.49091	3.1574	4.19068	1.28809		0.555924	0.148994	0.00399792	0.291084	58.7438	2.21858	6.04656	2.03167	0.116029
				50	967.926		26.1339	7.12502	6.40277	2.05269	8.33639		0.522157	0.315289	0.0113215	0.151233	59.883	1.76737	6.3431	2.09097	0.140073
19.8	0.6	QFM-1	Initial Composition A	100	1206.88			0	0	0	0			0	0		53.7813	8.23407	7.67463	2.00025	0.05
				90	1115.17		1.85012	0	0	8.21747	0		0.0666624	0	0	0.933338	55.2305	4.82311	6.84751	2.00372	0.0589086
				80	1079.29		11.5592	0	0	8.02129	0		0.307004	0	0	0.692996	56.0875	3.92509	6.70772	2.00163	0.0697019
				70	1027.46		21.3684	0	0	8.53059	0		0.422753	0	0	0.577247	57.7705	2.81776	6.00153	1.99969	0.090396
				60	987.586		24.4828	0	3.1451	8.07652	4.78974		0.457292	0	0.00373606	0.538972	59.6549	2.16069	5.82587	2.02511	0.108791
				50	959.677		23.8495	3.55829	6.6425	5.36723	11.192		0.453195	0.152238	0.0108839	0.383683	60.8143	1.77143	6.16186	2.08232	0.131243
16.5	0.5	QFM-1	Initial Composition A	100	1201.6			0	0	0	0			0	0		53.7808	8.234	7.67456	2.00026	0.05
				90	1101.13		0	0	0	9.44314	0		0	0	0	1	55.3501	4.542	6.64895	2.00471	0.059148
				80	1060.94		10.767	0	0	9.20568	0		0.257927	0	0	0.742073	56.3807	3.58619	6.43558	2.00244	0.0717644
				70	1012.72		19.6503	0	0	9.77298	0.554276		0.362106	0	0	0.637894	58.1357	2.60952	5.72045	2.00206	0.092264
				60	984.584		20.9971	0	2.52157	9.74301	6.34772		0.368373	0	0.00275173	0.628876	59.7959	2.15718	5.66806	2.02783	0.105423
				50	952.433		21.6794	0	6.41627	9.00001	13.2879		0.381388	0	0.00933915	0.609273	61.7845	1.74586	5.77962	2.0688	0.122615
13.2	0.4	QFM-1	Initial Composition A	100	1196.33			0	0	0	0				0		53.7803	8.23392	7.67449	2.00025	0.05
				90	1088.22		0	0	0	10.0029	0				0	1	55.46	4.32648	6.54564	2.005	0.060156
				80	1044.18		9.55035	0	0	10.3736	0		0.209882		0	0.790118	56.6377	3.30441	6.16386	2.00333	0.0734407
				70	1008.14		15.7165	0	0	11.1942	2.42438		0.279088		0	0.720912	58.2995	2.57954	5.64521	2.00806	0.0895264
				60	976.113		18.0031	0	2.51509	11.1414	8.57402		0.298203		0.00262291	0.699174	60.2159	2.07719	5.50455	2.03514	0.105121
				50	948.086		19.0856	0	6.02271	10.2711	14.3709		0.317617		0.00808476	0.674298	62.0094	1.73129	5.58937	2.07097	0.120257
9.9	0.3	QFM-1	Initial Composition A	100	1190.86				0	0	0				0		53.7798	8.23384	7.67442	2.00025	0.05
				90	1083.23		0		0	9.98429	0		0		0	1	55.4546	4.32907	6.55587	2.00499	0.0601626
				80	1027.42		8.15381		0	11.6645	0		0.162997		0	0.837003	57.0134	3.02597	5.85666	2.00432	0.0753633
				70	999.519		12.3365		0	12.6771	4.41593		0.207523		0	0.792477	58.6261	2.48175	5.48813	2.01428	0.0888499
				60	967.629		15.2765		2.37656	12.4679	10.2557		0.239517		0.00233523	0.758148	60.5749	2.00103	5.30327	2.04029	0.105079
				50	939.725		16.8216		5.95578	11.3821	15.7896		0.265827		0.0075286	0.726644	62.4183	1.67232	5.36885	2.07609	0.120591
6.6	0.2	QFM-1	Initial Composition A	100	1185.39				0	0	0						53.7792	8.23375	7.67434	2.00025	0.05
				90	1080.94		0		0	9.76144	0		0			1	55.4082	4.40828	6.60709	2.00488	0.0598011
				80	1016.67		4.61085		0	13.3118	1.75536		0.0854162			0.914584	57.3338	2.87559	5.66254	2.00977	0.0750286
				70	988.549		9.382		0	14.1338	6.30483		0.148578			0.851422	59.0279	2.35212	5.28074	2.02021	0.089374
				60	960.429		12.5627		1.89974	13.8548	11.2109		0.186697		0.00171263	0.811591	60.7753	1.9444	5.06492	2.04174	0.104466
				50	932.309		14.6438		5.68678	12.4851	16.6542		0.22061		0.00665498	0.772735	62.6928	1.62541	5.12844	2.07813	0.120436
Abbreviations: Grt = garnet, Cpx = clinopyroxene, Opx = orthopyroxene, Bt = biotite, Ol = olivine, Pl = plagioclase, Mag = magnetite.

## Sheet: Table S7
Table S7 Modeling results from pMELTS calculation of Initial Composition B under a constant fO2 of QFM + 1 and 3 wt% initial water content
Thickness (Km)	Pressure (GPa)	fO2	Starting composition	Melt fraction (wt%)	T (℃)	Mineral assemblages (wt%)							Fe fractionated (Femineral/Fecumulate)						Mlel compositions
						Grt	Cpx	Opx	Bt	Ol	Pl	Mag	Grt	Cpx	Opx	Bt	Ol	Mag	SiO2 (wt%)	FeOT (wt%)	MgO (wt%)	Sm/Yb	δ56Fe (‰)
66	2	QFM + 1	Initial Composition B	100	1328.32														51.1755	7.29016	9.00289	2	0.05
				90	1293.32		10.69						0	1					51.6042	6.43759	9.17098	1.99774	0.0565432
				80	1263.32	2.71	17.85						0.172496	0.827504					52.4428	5.49896	9.09771	2.3367	0.0667641
				70	1233.32	7.8	21.66						0.343777	0.656223					53.6878	4.49227	8.67844	3.22355	0.0823613
				60	1183.32	14.41	25.82						0.455234	0.544766					55.8294	3.15956	7.54397	5.19411	0.11427
				50	1113.32	20.69	29.41						0.536103	0.463897					58.6163	1.89462	5.48057	8.85151	0.175244
62.7	1.9	QFM + 1	Initial Composition B	100	1316.6														51.1755	7.29016	9.00186	2	0.05
				90	1281.6		10.57						0	1					51.5939	6.43759	9.17926	1.99777	0.0564763
				80	1251.6	0.07	19.15						0.00499373	0.995006					52.14	5.68253	9.17515	2.00383	0.0642018
				70	1216.6	6.4	23.34						0.281238	0.718762					53.605	4.47231	8.7001	2.95863	0.0825436
				60	1166.6	13.33	27.1						0.425964	0.574036					55.7779	3.13916	7.51396	4.83874	0.115852
				50	1101.6	19.41	30.12						0.512958	0.487042					58.4512	1.92533	5.56962	8.08228	0.174026
59.4	1.8	QFM + 1	Initial Composition B	100	1304.69														51.1755	7.29016	9.00082	2	0.05
				90	1269.69		10.44						0	1					51.5782	6.43692	9.17727	1.9978	0.0564722
				80	1234.69		20.24						0	1					52.2033	5.57057	9.15714	1.99549	0.0655846
				70	1199.69	5	24.94						0.223195	0.776805					53.5166	4.46233	8.70101	2.71471	0.082897
				60	1154.69	11.64	28.05						0.384788	0.615212					55.4842	3.23158	7.62211	4.30478	0.113576
				50	1089.43	17.6	30.82						0.4824	0.5176					58.4104	1.8914	5.67846	7.26262	0.172714
56.1	1.7	QFM + 1	Initial Composition B	100	1292.38														51.1755	7.29016	8.99979	2	0.05
				90	1257.38		10.36						0	1		0		0	51.5678	6.43692	9.17624	1.99782	0.0565118
				80	1222.38		20.07						0	1		0		0	52.1929	5.57057	9.16545	1.99553	0.0656028
				70	1182.38	3.62	26.51						0.164679	0.835321		0		0	53.4176	4.45234	8.72178	2.49294	0.0830333
				60	1137.38	10.26	29.28					0.37	0.329993	0.611153		0		0.0588533	55.6328	3.20067	7.33418	3.93217	0.111478
				50	1072.38	15.42	31.63		2.39			0.57	0.417717	0.51187		0.00134084		0.0690729	58.9147	1.75215	5.28088	6.07924	0.167503
52.8	1.6	QFM + 1	Initial Composition B	100	1280														51.1652	7.29016	8.99773	2	0.05
				90	1245		10.2						0	1		0		0	51.5522	6.43626	9.18357	1.99785	0.0564194
				80	1210		19.84						0	1		0		0	52.1667	5.56999	9.16346	1.99559	0.0656415
				70	1165	1.9	28.09					0.34	0.0828753	0.842471		0		0.0746533	53.4964	4.4319	8.50737	2.24209	0.0805701
				60	1120	8.34	30.45					1.3	0.244661	0.566982		0		0.188358	56.0598	3.14836	6.68527	3.46492	0.102568
				50	1055	13.09	32.4		3.54			1.24	0.345415	0.506439		0.0019232		0.146223	59.3952	1.63395	4.87215	5.16297	0.157947
49.5	1.5	QFM + 1	Initial Composition B	100	1267.38														51.1652	7.29016	8.9967	2	0.05
				90	1232.38		10.09						0	1		0		0	51.5418	6.43626	9.17219	1.99788	0.0565117
				80	1197.38		16.65						0	1		0		0	52.1509	5.56941	9.17082	1.99564	0.065653
				70	1152.38		28.72					1.24	0	0.755252		0		0.244748	53.7987	4.47278	7.99248	1.99468	0.0719108
				60	1102.38	5.87	31.47		0.97			2.21	0.162126	0.539072		0.000554292		0.298248	56.6	3	6.13684	2.95202	0.0915016
				50	1042.38	10.42	32.97		4.42			1.97	0.273311	0.496748		0.00222432		0.227717	59.6207	1.61051	4.59631	4.25562	0.140849
46.2	1.4	QFM + 1	Initial Composition B	100	1254.3														51.1652	7.29016	9.00495	2	0.05
				90	1219.3		10.02						0	1		0		0	51.5315	6.43626	9.18046	1.99789	0.0565681
				80	1184.3		19.49						0	1		0		0	52.1351	5.56883	9.17818	1.99568	0.0657952
				70	1139.3		28.31					1.87	0	0.662818		0		0.337182	54.1911	4.41054	7.56062	1.99551	0.0674758
				60	1089.3	2.16	32.29		1.99			3.11	0.0586043	0.532354		0.00111707		0.407924	56.886	2.97519	5.78953	2.31628	0.074074
				50	1024.3	7.99	33.67		5.53			2.68	0.206592	0.488028		0.0027118		0.302668	60.0402	1.50312	4.22991	3.58552	0.125883
42.9	1.3	QFM + 1	Initial Composition B	100	1241.21														51.1652	7.29016	9.00289	2	0.05
				90	1206.21		9.87						0	1		0		0	51.5158	6.43559	9.17744	1.99793	0.0565632
				80	1166.21		20.44						0	1		0		0	52.2087	5.45681	9.15913	1.99544	0.0673097
				70	1126.21		27.86					2.49	0	0.5832		0		0.4168	54.5626	4.35873	7.14017	1.99635	0.0623214
				60	1071.21		33.05		3.27			4	0	0.504453		0.00100941		0.494537	57.401	2.81542	5.343	2.01169	0.0595446
				50	1006.21	5.47	34.32		6.6			3.41	0.14062	0.478381		0.0028839		0.378116	60.3997	1.42751	3.88495	3.00027	0.107025
39.6	1.2	QFM + 1	Initial Composition B	100	1227.54									0					51.1652	7.29016	9.00082	2	0.05
				90	1192.54		9.81						0	1		0		0	51.5054	6.43559	9.18572	1.99794	0.0565441
				80	1157.54		19.15					0.27	0	0.898086		0		0.101914	52.2701	5.54805	9.01091	1.99605	0.0644909
				70	1112.54		27.45					3.11	0	0.51547		0		0.48453	54.9446	4.29647	6.70918	1.99718	0.056767
				60	1057.54		32.15		3.94			4.4	0	0.466384		0.00114567		0.53247	57.8074	2.69873	5.06248	2.01553	0.053026
				50	982.54	3.19	35.16		7.88			4.07	0.0813735	0.475443		0.00354594		0.439638	60.9638	1.27866	3.49995	2.55967	0.0900571
36.3	1.1	QFM + 1	Initial Composition B	100	1213.87		0							0					51.1652	7.29016	8.99876	2	0.05
				90	1178.87		9.67							1	0	0		0	51.4898	6.43493	9.19201	1.90878	0.0564692
				80	1143.87		19					1.07		0.680214	0	0		0.319786	52.7437	5.47703	8.49096	1.88678	0.0599254
				70	1103.87		25	1.87				3.26		0.452506	0.0410968	0		0.506397	55.011	4.11746	6.55032	1.87321	0.0546286
				60	1048.87		30.48	0.83	3.95			4.61		0.423735	0.0225308	0.00106563		0.552669	57.8925	2.64484	4.90449	1.86881	0.0491418
				50	968.87		35.01		8.95		1.44	5.08		0.406383	0	0.0037876		0.589829	61.1023	1.2987	3.33228	1.84304	0.0358309
33	1	QFM + 1	Initial Composition B	100	1199		0							0					51.1652	7.29016	8.9967	2	0.05
				90	1164		9.67							1	0	0	0	0	51.4898	6.43493	9.18994	1.99797	0.0566125
				80	1134		17.53			0.3		1.46		0.571223	0	0	0.0191528	0.409624	52.9296	5.45398	8.22044	1.99789	0.0563009
				70	1089		25.3		0.35	0.54		3.96		0.411274	0	8.32028e-05	0.0177384	0.570904	55.5741	4.1166	6.11848	2.00049	0.0464988
				60	1034		30.03	0.12	4.85			5.07		0.399917	0.00234463	0.00120053	0	0.596538	58.3447	2.57002	4.62289	2.0217	0.0397259
				50	969		31.87		9.23		4.36	5.6		0.360309	0	0.00341372	0	0.636277	60.9802	1.43657	3.43615	2.05752	0.0204048
29.7	0.9	QFM + 1	Initial Composition B	100	1188		0							0					51.1652	7.29016	8.99464	2	0.05
				90	1148		9.18			1.02				0.820611		0	0.179389	0	51.6556	6.07409	9.107	1.99857	0.0571571
				80	1118		16.95			1.28		2.2		0.433724		0	0.0657712	0.500505	53.6119	5.04106	7.60004	1.99935	0.0516909
				70	1078		23.76		0.34	1.38		4.21		0.364193		7.09726e-05	0.0446501	0.591086	55.8701	3.9273	5.83873	2.00157	0.0424173
				60	1023		29.06		5.32			5.41		0.369799		0.00118861	0	0.629013	58.5867	2.52674	4.42441	2.02387	0.0319365
				50	973		29.57		9.07		5.4	5.95		0.328031		0.0029475	0	0.669021	60.7154	1.62499	3.55492	2.06012	0.0110209
26.4	0.8	QFM + 1	Initial Composition B	100	1183		0							0					51.1652	7.29016	9.00289	2	0.05
				90	1133		8.17			2.15		0.37		0.5178		0	0.272786	0.209414	52.0182	5.6924	8.77044	1.99973	0.0554647
				80	1108		14.94			2.16		2.47		0.355688		0	0.105695	0.538617	53.8286	4.85195	7.32987	2.00055	0.0483313
				70	1063		22.84		0.86	1.8		4.61		0.325204		0.000170188	0.0544996	0.620126	56.3401	3.67662	5.47838	2.00471	0.036778
				60	1008		28.24		5.94			5.75		0.341542		0.001313	0	0.657145	58.9394	2.39992	4.14483	2.0274	0.0236557
				50	973		27.27		9.18		7.02	6.33		0.295375		0.0025582	0	0.702067	60.6013	1.7827	3.61392	2.06618	0.000961396
23.1	0.7	QFM + 1	Initial Composition B	100	1178														51.1652	7.29016	9.00082	2	0.05
				90	1123		5.62			3.16		0.67		0.309881		0	0.353662	0.336458	52.2085	5.48257	8.46798	2.00108	0.0524891
				80	1093		13.98			3.01		3.03		0.287724		0	0.128916	0.583361	54.3386	4.53081	6.83986	2.00183	0.0436855
				70	1048		21.91		1.37	2.18		4.97		0.292799		0.00025903	0.0630635	0.643879	56.7565	3.43567	5.12845	2.00776	0.0310133
				60	993		27.17		6.67		0.6	6.1		0.312903		0.00133734	0	0.68576	59.2957	2.28464	3.89751	2.03313	0.0140458
				50	968		24.86		9.7		9.7	6.76		0.272401		0.00234294	0	0.725256	60.7369	1.85811	3.60536	2.07833	-0.00782963
19.8	0.6	QFM + 1	Initial Composition B	100	1173														51.1549	7.29016	8.99876	2	0.05
				90	1108		4.68			7.09		1.48		0.141958		0	0.441946	0.416097	52.7835	5.11175	7.87873	2.00315	0.0495983
				80	1078		12.98			3.81		3.56		0.235852		0	0.145715	0.618433	54.8072	4.21994	6.35069	2.00306	0.0385803
				70	1033		20.99		1.89	2.51		5.33		0.263034		0.000341716	0.0698872	0.666737	57.1578	3.21604	4.80944	2.01083	0.024634
				60	993		24.98		6.6		1.52	6.41		0.278224		0.00123287	0	0.720543	59.0785	2.49215	3.9644	2.03578	0.00608803
				50	968		23		9.65		10.4	7.07		0.241931		0.00206845	0	0.756001	60.6054	2.0251	3.62093	2.08035	-0.0169289
16.5	0.5	QFM + 1	Initial Composition B	100	1167														51.1549	7.29016	9.00701	2	0.05
				90	1092		3.64			4.97		2.25		0.103071		0	0.293701	0.603228	53.3175	4.76141	7.29014	2.00406	0.0418942
				80	1062		11.93			4.58		4.07		0.194321		0	0.159952	0.645727	55.2391	3.93971	5.89085	2.00427	0.0330803
				70	1022		19.27		1.68	3.3		5.49		0.232968		0.000298598	0.0897395	0.676994	57.2741	3.08913	4.5909	2.01091	0.0201744
				60	987		22.24		6.79	0.54	3.89	6.71		0.237617		0.00115402	0.0137666	0.747463	59.1766	2.53509	3.92311	2.04426	-0.00333474
				50	962		20.96		10		12.25	7.48		0.209651		0.00184704	0	0.788502	60.7407	2.11015	3.55877	2.08893	-0.0296071
13.2	0.4	QFM + 1	Initial Composition B	100	1162														51.1549	7.29016	9.00495	2	0.05
				90	1082		0.63			5.96		2.59		0.0166229		0	0.331191	0.652186	53.434	4.58213	7.00765	2.00549	0.0376871
				80	1047		10.76			5.31		4.54		0.159422		0	0.170928	0.66965	55.6341	3.66944	5.46154	2.00543	0.0271234
				70	1007		18.28		2.18	3.58		5.82		0.209465		0.000336305	0.093274	0.696925	57.6169	2.89023	4.28214	2.01383	0.0129859
				60	982		15.59		6.7		5.64	6.95		0.172981		0.00110907	0	0.82591	59.229	2.54557	3.84873	2.05742	-0.024244
				50	957		19.05		10.3		13.7	7.87		0.181009		0.00160059	0	0.81739	60.8462	2.20511	3.48491	2.09579	-0.0412785
9.9	0.3	QFM + 1	Initial Composition B	100	1157														51.1549	7.29016	9.00289	2	0.05
				90	1067					6.61		3.38		0		0	0.297949	0.702051	53.9472	4.27315	6.44077	2.00678	0.0310671
				80	1032		9.05			6.02		4.99		0.124444		0	0.180064	0.695491	55.9817	3.4196	5.05249	2.00684	0.0199232
				70	992		16.73		3.05	3.78	1.37	6.27		0.180505		0.000451473	0.0944985	0.724545	58.0672	2.71342	3.99499	2.02188	0.00263663
				60	977		16.96		6.38	2.11	6.94	7.16		0.168043		0.000936506	0.0506525	0.780368	59.269	2.53456	3.75367	2.05255	-0.0177191
				50	952		17.09		10.34	0.28	14.78	8.19		0.155234		0.00144941	0.00651533	0.836801	60.9324	2.2466	3.38888	2.10002	-0.0507504
6.6	0.2	QFM + 1	Initial Composition B	100	1151														51.1549	7.27985	8.99051	2	0.05
				90	1061					6.55		3.65		0		0	0.280394	0.719606	54.108	4.24255	6.30795	2.00704	0.0289936
				80	1016		8.12			6.73		5.43		0.10329		0	0.187188	0.709522	56.3085	3.1906	4.65392	2.00773	0.0135098
				70	986		13.48		2.13	5.07		6.44		0.141987		0.000279528	0.123091	0.734643	57.9969	2.68127	3.88941	2.01792	-0.00251886
				60	966		14.45		6.86	2.56	9.52	7.61		0.135622		0.00092125	0.0588263	0.804631	59.6331	2.46331	3.57023	2.06343	-0.0304248
				50	946		15.01		10.11	0.87	15.49	8.42		0.147016		0.000139449	0.0193201	0.833525	60.9993	2.24518	3.27185	2.10142	-0.0531177
Abbreviations: Grt = garnet, Cpx = clinopyroxene, Opx = orthopyroxene, Bt = biotite, Ol = olivine, Pl = plagioclase, Mag = magnetite.

## Sheet: Table S8
Table S8 Modeling results from pMELTS calculation of Initial Composition B under a constant fO2 of QFM and 3 wt% initial water content
Thickness (Km)	Pressure (GPa)	fO2	Starting composition	Melt fraction (wt%)	T (℃)	Mineral assemblages (wt%)							Fe fractionated (Femineral/Fecumulate)						Mlel compositions
						Grt	Cpx	Opx	Bt	Ol	Pl	Mag	Grt	Cpx	Opx	Bt	Ol	Mag	SiO2 (wt%)	FeOT (wt%)	MgO (wt%)	Sm/Yb	δ56Fe (‰)
66	2	QFM	Initial Composition B	100	1377.34														51.2064	7.29016	9.01423	2	0.05
				90	1332.34	6.16		3.03					0.692544	0	0.307456				51.9346	5.86592	8.73164	2.84138	0.0607252
				80	1297.34	16.75	0.93	1.68					0.884291	0.034891	0.080818				53.6215	4.87374	8.13883	5.4298	0.0792386
				70	1267.34	22.27	6.52						0.84306	0.15694	0				55.2131	3.92812	7.47911	8.14386	0.0998186
				60	1222.34	27.95	11.27						0.814506	0.185494	0				57.928	2.72689	6.11287	13.4656	0.138411
				50	1162.34	32.94	15.57						0.710304	0.289696	0				62.0147	1.70195	4.09105	22.8408	0.202744
62.7	1.9	QFM	Initial Composition B	100	1309.96														51.2064	7.29016	9.01114	2	0.05
				90	1279.96		9.8						0	1					51.4587	6.42458	9.27788	1.99794	0.0552052
				80	1249.96	4.57	15.84						0.333689	0.666311					52.3805	5.33264	9.19647	2.60394	0.0670209
				70	1219.96	9.93	19.47						0.477172	0.522828					53.5979	4.32376	8.77285	3.67679	0.0833933
				60	1169.96	16.82	23.49						0.574322	0.425678					55.8037	3.01243	7.57426	6.10677	0.117697
				50	1099.96	23.27	26.91						0.642438	0.357562					58.7352	1.79921	5.36357	10.6979	0.184477
59.4	1.8	QFM	Initial Composition B	100	1298.24														51.2064	7.29091	9.00175	2	0.05
				90	1264.24		9.67						0	1					51.4537	6.42591	9.27877	1.99797	0.0551348
				80	1233.24	2.82	17.85						0.214374	0.785626					52.2404	5.3228	9.27019	2.35195	0.0662713
				70	1203.24	8.44	21.18						0.416503	0.583497					53.4949	4.29422	8.81726	3.35647	0.0832622
				60	1158.24	15.05	24.53						0.534965	0.465035					55.5053	3.09474	7.70526	5.39753	0.115022
				50	1088.24	21.68	27.59						0.617307	0.382693					58.6471	1.77641	5.48452	9.72171	0.182736
56.1	1.7	QFM	Initial Composition B	100	1286.33														51.1961	7.29016	8.99979	2	0.05
				90	1256.33		9.53						0	1		0			51.438	6.42458	9.26547	1.998	0.0551559
				80	1221.33		19.13						0	1		0			51.9011	5.49553	9.39747	1.99576	0.0628513
				70	1186.33	6.95	22.83						0.351478	0.648522		0			53.3751	4.27377	8.85998	3.0622	0.0830947
				60	1141.33	13.89	25.83						0.502662	0.497338		0			55.4164	3.07401	7.70502	5.00125	0.116145
				50	1076.33	19.96	28.22		1.62				0.58992	0.408636		0.0014444			58.5954	1.74246	5.6343	8.82773	0.180393
52.8	1.6	QFM	Initial Composition B	100	1274.02														51.1961	7.29016	8.99876	2	0.05
				90	1244		9.43						0	1		0			51.4277	6.42458	9.26443	1.99802	0.0551664
				80	1204		20.15						0	1		0			51.9539	5.36271	9.38994	1.99551	0.0641968
				70	1169	5.46	24.45						0.284583	0.715417		0			53.2449	4.25332	8.90166	2.79321	0.0829042
				60	1124	12.74	27.1						0.470059	0.529941		0			55.3274	3.05327	7.70478	4.63733	0.117327
				50	1059	18.51	28.95		2.81				0.566019	0.431209		0.00277185			58.7979	1.6141	5.61007	7.64223	0.184284
49.5	1.5	QFM	Initial Composition B	100	1261.52										0				51.1961	7.29016	9.00701	2	0.05
				90	1231.52		9.32						0	1	0	0			51.412	6.42392	9.26244	1.99804	0.0552463
				80	1191.52		19.96						0	1	0.00455479	0			51.9381	5.37254	9.38689	1.99556	0.0643499
				70	1151.52	3.84	25.96	0.15					0.207162	0.788283	0	0			53.0985	4.22197	8.94242	2.5281	0.0824641
				60	1106.52	11.52	28.3		0.14				0.433526	0.566474	0	0			55.2432	3.01116	7.71426	4.28079	0.118454
				50	1046.52	16.81	29.52		3.71				0.534221	0.461705	0	0.00407416			58.7355	1.58057	5.77066	6.75194	0.181667
46.2	1.4	QFM	Initial Composition B	100	1248.63														51.1961	7.29016	9.00598	2	0.05
				90	1213.63		10.72						0	1		0			51.4593	6.28234	9.29621	1.99773	0.0562812
				80	1178.63		19.8						0	1		0			51.9277	5.37254	9.38585	1.9956	0.0644445
				70	1133.63	1.04	28.78						0.0611573	0.938843		0			52.8631	4.02299	8.99164	2.12522	0.0788971
				60	1088.63	9.56	29.51		1.34				0.379252	0.619497		0.00125079			55.3299	2.79912	7.78281	3.77608	0.118113
				50	1033.63	15.08	30.08		4.61				0.529241	0.464981		0.00577823			58.6565	1.55753	5.94088	5.95781	0.178801
42.9	1.3	QFM	Initial Composition B	100	1235.55		0							0					51.1961	7.29016	9.00495	2	0.05
				90	1200.55		10.61						0	1	0	0			51.449	6.28234	9.29518	1.99776	0.0562966
				80	1165.55		19.63						0	1	0	0			51.9119	5.37199	9.38279	1.99564	0.0645518
				70	1115.55		26.59	3.7					0	0.877847	0.122153	0			52.8483	3.82565	8.94115	2.01176	0.0823964
				60	1075.55	6.51	29.14	1.98	1.98				0.283222	0.668868	0.0454482	0.00246118			55.0347	2.7223	7.99033	3.09398	0.114034
				50	1015.55	13.63	30.78		4.75				0.496439	0.496641	0	0.00692028			58.8734	1.44007	5.94663	5.4958	0.183524
39.6	1.2	QFM	Initial Composition B	100	1222.27		0							0					51.1961	7.29016	9.0132	2	0.05
				90	1187.27		10.48						0	1	0	0		0	51.4386	6.29269	9.29311	1.99779	0.0563865
				80	1152.27		19.36						0	1	0	0		0	51.8961	5.36104	9.37039	1.99568	0.0648451
				70	1102.27		25.94	4.27					0	0.858656	0.141344	0		0	52.8797	3.76294	8.88784	2.0147	0.0835288
				60	1057.27	3.75	29.82	2.47	3.09			0.82	0.156838	0.652316	0.0540316	0.00290415		0.13391	55.4785	2.53178	7.54071	2.59072	0.103542
				50	997.27	11.4	31.47		6.76			0.66	0.406437	0.495354	0	0.00964039		0.088569	59.2742	1.34377	5.57719	4.61399	0.171715
36.3	1.1	QFM	Initial Composition B	100	1208.59		0							0					51.1961	7.29016	9.00186	2	0.05
				90	1173.59		10.38						0	1	0	0	0	0	51.4333	6.29204	9.29008	1.99781	0.0562206
				80	1133.59		19.51			0.95			0	0.891863	0	0	0.108137	0	52.1726	5.03119	9.24948	1.99614	0.0659382
				70	1088.59		23.31	4.84					0	0.756263	0.243737	0	0	0	52.916	3.69983	8.84302	2.01942	0.0838797
				60	1038.59	0.66	30.52	2.9	4.18			1.89	0.0275276	0.55472	0.107448	0.00484281	0	0.305462	55.9731	2.35146	6.9662	2.12001	0.0834424
				50	978.59	8.59	32.15		7.72			1.47	0.315181	0.482527	0	0.0107908	0	0.191501	59.6617	1.24736	5.14588	3.79223	0.152559
33	1	QFM	Initial Composition B	100	1198.44									0					51.1961	7.29016	9.01011	2	0.05
				90	1158.44		9.5			1.15			0	0.766706	0	0	0.233294	0	51.6042	5.9408	9.17615	1.99856	0.056744
				80	1123.44		17.47			2.12			0	0.762808	0	0	0.237192	0	52.3587	4.83167	9.08978	1.99723	0.065673
				70	1073.44		25.24	1.63	0.52	2.31		0.51	0	0.659886	0.0716449	0.000486989	0.162252	0.10573	53.8767	3.46917	8.26332	2.00607	0.0797334
				60	1023.44		29.81	0.4	5.07			2.58	0	0.549926	0.0155254	0.00564301	0	0.428906	56.4953	2.25603	6.55824	2.02262	0.068307
				50	963.44	5.45	32.44		8.76		1.23	2.61	0.205403	0.457834	0	0.0115407	0	0.325222	59.7972	1.23587	4.89279	3.02553	0.119677
29.7	0.9	QFM	Initial Composition B	100	1193.75		0							0					51.1961	7.29016	9.00907	2	0.05
				90	1143.75		8.25			2.44				0.567415	0	0	0.432585	0	51.7905	5.57856	9.00021	1.99947	0.0571995
				80	1108.75		16.36			3.37				0.646814	0	0	0.353186	0	52.6496	4.49917	8.88196	1.99812	0.0664846
				70	1058.75		24.56		0.88	3.92		1		0.563571	0	0.000737872	0.248708	0.186983	54.649	3.22817	7.72357	2.00131	0.0753039
				60	1013.75		29.52	1.73	5.6			3.09		0.51642	0.054903	0.00438817	0	0.424289	56.7834	2.27511	6.32418	2.03131	0.0771663
				50	968.75		30.67	0.2	9.45		5.49	4.36		0.472207	0.00593592	0.00904263	0	0.512814	59.0271	1.57223	5.27277	2.06116	0.058642
26.4	0.8	QFM	Initial Composition B	100	1189.06		0							0					51.1961	7.29016	9.00804	2	0.05
				90	1129.06		6.91			3.69				0.414204	0	0	0.585796	0	51.9768	5.22666	8.83357	2.00037	0.057496
				80	1094.06		15.27			4.57				0.550823	0	0	0.449177	0	52.9565	4.19827	8.65427	1.99899	0.0674707
				70	1049.06		22.8		0.61	4.99		1.14		0.491249	0	0.00049225	0.302007	0.206251	54.9138	3.09138	7.40992	2.00133	0.0736337
				60	999.06		29.09	0.19	6.34	0.7		3.6		0.478116	0.00576582	0.00558187	0.0336995	0.476836	57.3973	2.18986	5.92728	2.02779	0.0606969
				50	969.06		28.11		9.67		7.36	4.89		0.374906	0	0.0130707	0	0.612024	58.9346	1.74051	5.35338	2.06762	0.0343189
23.1	0.7	QFM	Initial Composition B	100	1184.18		0							0					51.1961	7.29016	8.9967	2	0.05
				90	1114.18		5.69			4.89				0.326158		0	0.673842	0	52.1424	4.89547	8.66694	2.00123	0.0579589
				80	1079.18		14.22			5.77				0.469191		0	0.530809	0	53.2945	3.89732	8.41613	1.99985	0.0685069
				70	1034.18		21.91		1.14	5.39		1.59		0.424083		0.00083687	0.303353	0.271727	55.4465	2.87206	6.96501	2.00457	0.0698534
				60	989.18		27.31		6.54	1.39	0.71	3.84		0.396945		0.00506298	0.069138	0.528854	57.6577	2.12655	5.71758	2.03062	0.0494227
				50	969.18		25.65		9.62	0.27	8.66	5.22		0.330442		0.00824014	0.0126275	0.648691	58.8235	1.88699	5.39954	2.07189	0.0249541
19.8	0.6	QFM	Initial Composition B	100	1179.1		0							0					51.1961	7.29016	9.00495	2	0.05
				90	1099.1		4.43			6.07				0.212543		0	0.787457	0	52.3184	4.58497	8.47961	2.00208	0.0582887
				80	1064.1		13.14			7				0.403243		0	0.596757	0	53.6895	3.60632	8.14695	2.00074	0.0700445
				70	1019.1		21.01		1.66	5.76		2.01		0.381058		0.00114936	0.30044	0.317353	55.9315	2.67335	6.54031	2.00773	0.0669649
				60	984.1		24.1		6.8	2.13	3.7	4.22		0.333266		0.00507351	0.101312	0.560349	57.8048	2.15956	5.65783	2.04137	0.0412777
				50	964.1		22.98		9.19	0.69	11.09	5.64		0.284569		0.0121067	0.0306784	0.672646	58.9979	1.93038	5.30802	2.07978	0.0165391
16.5	0.5	QFM	Initial Composition B	100	1173.83		0							0					51.1961	7.29016	9.00392	2	0.05
				90	1083.83		3.21			7.26				0.138205		0	0.861795	0	52.5254	4.27448	8.27261	2.00293	0.0588903
				80	1048.83		12.04			8.11		0.2		0.325259		0	0.628059	0.0466817	54.1628	3.32606	7.75491	2.00179	0.0699882
				70	1008.83		19.26		1.43	6.73		2.11		0.31693		0.000964785	0.354164	0.327942	56.1378	2.55741	6.26827	2.00778	0.0642401
				60	978.83		21.17		6.87	2.9	6.04	4.54		0.280662		0.00448543	0.131487	0.583366	57.9549	2.17095	5.54379	2.04948	0.0343433
				50	958.83		20.55		10.05	1.2	13	5.97		0.264406		0.00636829	0.0501859	0.67904	59.1916	1.9523	5.19312	2.09024	0.0122446
13.2	0.4	QFM	Initial Composition B	100	1168.55		0							0					51.1961	7.29016	9.00186	2	0.05
				90	1068.55		2.34			8.39				0.0896652		0	0.910335	0	52.8103	3.97474	8.07577	2.00368	0.0597462
				80	1033.55		10.89			8.99		0.7		0.253556		0	0.605626	0.140818	54.6674	3.07692	7.22037	2.00307	0.0673639
				70	993.55		18.27		1.96	7.03		2.51		0.283081		0.00124514	0.348346	0.367328	56.5644	2.37946	5.85368	2.01094	0.0603759
				60	973.55		18.4		6.74	3.75	7.79	4.81		0.236607		0.00426831	0.159639	0.599485	58.0868	2.17118	5.38704	2.0549	0.0285178
				50	953.55		18.24		10.04	1.78	14.45	6.25		0.229283		0.00621553	0.0699743	0.694527	59.3605	1.96285	5.04538	2.09573	0.00526792
9.9	0.3	QFM	Initial Composition B	100	1163.09		0							0					51.1961	7.29016	9.01011	2	0.05
				90	1058.09		0.66			8.84		0.38		0.0227433		0	0.862567	0.11469	52.7884	3.85929	7.78479	2.00465	0.0568065
				80	1023.09		8.5			9.92		0.96		0.187201		0	0.626293	0.186507	54.8987	2.95065	6.87584	2.00436	0.0643186
				70	983.09		15.41		2.57	7.52	2.81	3.18		0.221008		0.00151121	0.34491	0.432572	56.9967	2.29741	5.54616	2.02201	0.0507549
				60	968.09		15.67		6.43	4.67	9.12	5.07		0.196196		0.00440529	0.18797	0.611429	58.1795	2.16023	5.18771	2.05821	0.0231419
				50	948.09		15.97		9.88	2.47	15.55	6.49		0.197865		0.00753579	0.093067	0.701532	59.5105	1.97278	4.86549	2.09909	-0.00012631
6.6	0.2	QFM	Initial Composition B	100	1157.42		0							0					51.1858	7.29016	8.99876	2	0.05
				90	1047.42		0			9.06		1.17		0		0	0.714568	0.285432	53.1615	3.70485	7.32588	2.00573	0.0518089
				80	1002.42		8.26			10.67		1.62		0.155445		0	0.575622	0.268934	55.5613	2.64033	6.19127	2.00558	0.0607838
				70	977.42		12.18		1.79	9	3.73	3.27		0.169047		0.0010186	0.399472	0.430462	57.0251	2.26514	5.33507	2.02225	0.048085
				60	962.42		12.89		5.95	5.7	10.06	5.31		0.155891		0.00393757	0.221613	0.618558	58.2434	2.14862	4.95546	2.05951	0.0181928
				50	942.42		13.7		9.58	3.27	16.29	6.68		0.166033		0.00714738	0.120519	0.7063	59.631	1.96099	4.66315	2.10029	-0.00535494
Abbreviations: Grt = garnet, Cpx = clinopyroxene, Opx = orthopyroxene, Bt = biotite, Ol = olivine, Pl = plagioclase, Mag = magnetite.

## Sheet: Table S9
Table S9 Modeling results from pMELTS calculation of Initial Composition B under a constant fO2 of QFM - 1 and 3 wt% initial water content
Thickness (Km)	Pressure (GPa)	fO2	Starting composition	Melt fraction (wt%)	T (℃)	Mineral assemblages (wt%)						Fe fractionated (Femineral/Fecumulate)					Mlel compositions
						Grt	Cpx	Opx	Bt	Ol	Pl	Grt	Cpx	Opx	Bt	Ol	SiO2 (wt%)	FeOT (wt%)	MgO (wt%)	Sm/Yb	δ56Fe (‰)
66	2	QFM - 1	Initial Composition B	100	1317.94												51.2289	9.02033	7.28741	2	0.05
				90	1293.83	3.37131	6.7521					0.492345	0.507655				51.7286	9.17013	6.32832	2.40615	0.0575967
				80	1269.72	8.42508	11.0275					0.603912	0.396088				52.5842	9.05739	5.35853	3.25521	0.0689733
				70	1233.55	14.5097	15.774					0.656153	0.343847				54.0217	8.56595	4.15018	4.91135	0.0891548
				60	1189.35	20.1506	19.7385					0.689782	0.310218				55.9266	7.53376	3.01853	7.61142	0.119931
				50	1121.03	26.045	23.6782					0.722954	0.277046				58.8147	5.44308	1.83173	13.0091	0.183967
62.7	1.9	QFM - 1	Initial Composition B	100	1306.71	0	0										51.2278	9.01792	7.29321	2	0.05
				90	1278.8	1.02852	8.90817					0.182402	0.817598				51.5089	9.29274	6.35113	2.11436	0.0558161
				80	1254.88	6.3294	12.9369					0.493084	0.506916				52.3712	9.17032	5.37775	2.88089	0.0674055
				70	1218.99	12.7322	17.376					0.602667	0.397333				53.8217	8.66041	4.16515	4.39313	0.0879981
				60	1175.13	18.6906	21.0402					0.659071	0.340929				55.7452	7.60215	3.02995	6.89547	0.119452
				50	1103.36	25.2319	24.7991					0.708345	0.291655				58.8197	5.34463	1.78665	12.3269	0.189572
59.4	1.8	QFM - 1	Initial Composition B	100	1294.93	0	0										51.2275	9.01786	7.29316	2	0.05
				90	1267.01	0	9.32617					0	1				51.3939	9.33045	6.4062	1.99804	0.0547463
				80	1239.08	4.35367	14.8923					0.36644	0.63356				52.1801	9.27921	5.37615	2.56879	0.0660479
				70	1203.18	11.1061	19.0305					0.546468	0.453532				53.6595	8.73834	4.1543	3.97145	0.0873522
				60	1159.3	17.3961	22.3912					0.628252	0.371748				55.6205	7.63442	3.01409	6.32919	0.120002
				50	1091.48	23.9007	25.5768					0.689553	0.310217				58.6353	5.45176	1.80121	11.1488	0.188196
56.1	1.7	QFM - 1	Initial Composition B	100	1283.05	0	0										51.2271	9.0178	7.29311	2	0.05
				90	1251.13	0	10.4057					0	1				51.4165	9.35873	6.28907	1.9978	0.0555177
				80	1219.21	3.19718	17.2829					0.267505	0.732495				52.1348	9.3476	5.23304	2.40501	0.0666493
				70	1187.29	9.44342	20.6224					0.484843	0.515157				53.4842	8.82145	4.15165	3.58068	0.086454
				60	1143.4	16.0868	23.6879					0.595862	0.404138				55.4829	7.67327	3.00453	5.80022	0.12033
				50	1075.57	22.4324	26.2814		1.38021			0.668881	0.329664		0.00145531		58.8014	5.46677	1.68425	10.11	0.191054
52.8	1.6	QFM - 1	Initial Composition B	100	1270.79	0	0										51.2267	9.01773	7.29305	2	0.05
				90	1238.89	0	10.3172					0	1				51.4059	9.35366	6.28749	1.99782	0.0555714
				80	1203.01	1.16434	19.1067					0.106456	0.893544				51.9267	9.4576	5.24065	2.13565	0.0649231
				70	1171.11	7.75941	22.1834					0.416632	0.583368				53.3017	8.90588	4.15054	3.22398	0.0854064
				60	1127.26	14.7711	24.9498					0.561577	0.438423				55.3377	7.71431	2.99737	5.31175	0.120548
				50	1063.47	20.766	26.8558		2.2775			0.64436	0.352979		0.00266103		58.7389	5.6234	1.64602	8.95823	0.188677
49.5	1.5	QFM - 1	Initial Composition B	100	1258.41	0	0										51.2263	9.01766	7.29299	2	0.05
				90	1226.55	0	10.1854					0	1				51.3944	9.34766	6.29094	1.99785	0.0555972
				80	1190.71	0	19.493					0	1				51.7693	9.51271	5.30666	1.99566	0.0633474
				70	1154.87	5.99217	23.7144					0.338236	0.661764				53.0994	8.99635	4.1564	2.88769	0.0840273
				60	1111.06	13.4086	26.1801					0.524271	0.475729				55.1737	7.76376	2.9963	4.84722	0.120455
				50	1051.33	19.048	27.4293		3.16424			0.616585	0.379305		0.00411		58.6654	5.80416	1.61474	7.90551	0.185568
46.2	1.4	QFM - 1	Initial Composition B	100	1245.7												51.2258	9.01757	7.29293	2	0.05
				90	1213.54	0	10.1706	0	0			0	1	0	0		51.3866	9.3451	6.28316	1.99785	0.0557022
				80	1177.37	0	19.4776	0	0			0	1	0	0		51.7627	9.50423	5.29146	1.99567	0.0636478
				70	1137.17	3.8634	24.7351	1.05906	0			0.227751	0.718356	0.0538921	0		52.8908	9.05611	4.0392	2.53783	0.0829209
				60	1092.95	11.8776	27.0713	0.240896	0.809297			0.481362	0.509097	0.00856043	0.000980423		55.2197	7.82096	2.84511	4.4003	0.121263
				50	1036.67	17.4097	28.085	0	4.16806			0.586416	0.40749	0	0.0060942		58.7311	5.92197	1.5469	7.04439	0.184865
42.9	1.3	QFM - 1	Initial Composition B	100	1232.62												51.2253	9.01749	7.29285	2	0.05
				90	1200.56	0	10.0715	0	0			0	1	0	0		51.3768	9.34054	6.28466	1.99787	0.0557515
				80	1160.48	0	19.968	0.280267	0			0	0.976896	0.0231037	0		51.7993	9.48898	5.16072	1.99682	0.0649119
				70	1116.4	1.72437	25.3284	3.18089	0			0.103081	0.730931	0.165988	0		52.7743	9.04032	3.76193	2.23614	0.0833654
				60	1076.33	9.62163	27.4055	1.24557	1.77623			0.410739	0.539265	0.0475157	0.00248054		55.1833	7.93739	2.66673	3.80639	0.119814
				50	1020.22	15.8789	28.7481	0	5.21781			0.554964	0.436391	0	0.0086453		58.8568	5.99036	1.45803	6.33676	0.185899
39.6	1.2	QFM - 1	Initial Composition B	100	1219.34												51.2248	9.01739	7.29278	2	0.05
				90	1187.4	0	9.94092	0	0			0	1	0	0		51.3666	9.33548	6.29019	1.9979	0.055779
				80	1147.49	0	19.3091	0.817595	0			0	0.932209	0.0677913	0		51.7876	9.46318	5.1061	1.99943	0.0652789
				70	1099.58	0	25.3446	4.82319	0			0	0.738915	0.261085	0		52.6477	9.04523	3.60861	2.01759	0.0827668
				60	1059.67	7.09687	27.7725	2.44584	2.6845			0.319593	0.575476	0.100575	0.00435586		55.1754	8.05549	2.49254	3.23415	0.1177
				50	1003.78	14.3324	29.3865	0	6.22034			0.520215	0.4681	0	0.0116854		58.9356	6.07429	1.37965	5.68668	0.186293
36.3	1.1	QFM - 1	Initial Composition B	100	1207.03												51.2242	9.0173	7.29269	2	0.05
				90	1175.13	0	8.77715	0	0	0.697138		0	0.816177	0	0	0.183823	51.4531	9.238	6.14908	1.9985	0.0556155
				80	1135.26	0	17.8627	0	0	1.73858		0	0.777385	0	0	0.222615	52.1325	9.23589	4.85019	1.99693	0.0648189
				70	1087.41	0	24.7227	3.00241	0	1.77995		0	0.686321	0.158261	0	0.155418	53.0801	8.80056	3.5061	2.00975	0.0817876
				60	1043.55	4.3461	28.0838	3.73772	3.49257	0		0.207983	0.618607	0.166811	0.00659893	0	55.0594	8.2045	2.34936	2.70568	0.114155
				50	987.723	12.7271	30.004	0	7.16239	0		0.480809	0.503941	0	0.0152492	0	58.9457	6.19074	1.31667	5.07417	0.185418
33	1	QFM - 1	Initial Composition B	100	1202.73												51.2238	9.01723	7.29264	2.00022	0.05
				90	1158.92	0	7.91303	0	0	2.12442		0	0.557981	0	0	0.442019	51.6799	9.06287	5.70977	1.99938	0.0563285
				80	1119.08	0	16.9717	0	0	3.14052		0	0.637195	0	0	0.362805	52.4855	8.99218	4.47218	1.99786	0.0660162
				70	1067.3	0	24.9084	0	0	5.09776		0	0.599351	0	0	0.400649	54.1531	8.20652	3.11273	1.99693	0.0831412
				60	1023.48	2.14333	28.5846	4.31704	4.4895	0.400908		0.105834	0.64899	0.20357	0.00981263	0.0317937	55.2435	8.17536	2.12663	2.34797	0.113402
				50	971.7	10.8788	30.4846	0.348693	7.98591	0		0.427658	0.539459	0.0135654	0.0193172	0	58.8638	6.30488	1.25366	4.44804	0.183617
29.7	0.9	QFM - 1	Initial Composition B	100	1198.05												51.2234	9.01715	7.29258	2.00023	0.05
				90	1146.39	0	6.03594	0	0	3.42729	0	0	0.366278	0	0	0.633722	51.844	8.8622	5.41446	2.00043	0.0563039
				80	1106.65	0	15.4174	0	0	4.35571	0	0	0.526081	0	0	0.473919	52.7423	8.7602	4.22263	1.99884	0.0663551
				70	1054.98	0	23.4731	0	0	6.30273	0	0	0.523006	0	0	0.476994	54.564	7.89787	2.91538	1.99794	0.0841986
				60	1003.32	0	29.1002	3.04626	5.2125	2.41135	0	0	0.649317	0.14482	0.012207	0.193656	55.7741	7.83857	1.90307	2.03417	0.110329
				50	959.609	7.15422	30.1959	1.75831	8.54903	0.496244	1.23129	0.296868	0.569743	0.0738515	0.0240338	0.0355039	58.2867	6.66201	1.23064	3.4219	0.170523
26.4	0.8	QFM - 1	Initial Composition B	100	1193.36												51.2229	9.01707	7.29251	2.00022	0.05
				90	1129.06		5.42344	0	0	4.7451	0		0.266222	0	0	0.733778	52.0663	8.66388	4.99419	2.00121	0.057364
				80	1092.89		14.1332	0	0	5.58025	0		0.434497	0	0	0.565503	53.0451	8.50333	3.94958	1.99977	0.0672037
				70	1040.65		22.3884	0	0.27262	7.29363	0		0.465485	0	0.000383334	0.534132	55.0017	7.59689	2.69367	1.99992	0.0861031
				60	984.391		29.0217	0.282982	5.86913	4.77656	0		0.604666	0.0128842	0.0134035	0.369047	56.6821	7.29006	1.71943	2.02407	0.11124
				50	956.261		27.7411	1.54905	9.2297	4.17401	7.80221		0.566463	0.0713298	0.0297118	0.332496	57.3238	7.62688	1.34907	2.07229	0.129472
23.1	0.7	QFM - 1	Initial Composition B	100	1188.48												51.2224	9.01699	7.29244	2.00022	0.05
				90	1116.36		3.44807		0	5.9716	0		0.151628		0	0.848372	52.1948	8.44664	4.73533	2.00223	0.0573669
				80	1076.29		13.3763		0	6.97792	0		0.358752		0	0.641248	53.5688	8.17515	3.60105	2.00068	0.0692199
				70	1028.21		21.0442		0.323843	8.32189	0		0.410302		0.000440496	0.589257	55.3483	7.29163	2.52629	2.00103	0.0874921
				60	980.132		26.1818		5.59568	6.29505	1.5217		0.514454		0.011831	0.473715	56.8411	7.1559	1.7343	2.02666	0.107865
				50	956.093		25.247		8.81145	6.31857	9.03224		0.487818		0.0246537	0.487529	57.634	7.47058	1.4305	2.06591	0.120505
19.8	0.6	QFM - 1	Initial Composition B	100	1183.4												51.2219	9.0169	7.29237	2.00022	0.05
				90	1099.58		2.62076		0	7.18863	0		0.0989496		0	0.90105	52.3904	8.2261	4.3814	2.00302	0.0583989
				80	1063.65		11.7555		0	8.21147	0		0.288338		0	0.711662	53.922	7.88615	3.37923	2.00169	0.0700062
				70	1011.76		20.2572		0.871108	9.0699	0		0.372863		0.00118693	0.62595	55.7929	6.98457	2.3027	2.00399	0.0904434
				60	975.839		23.186		5.4096	7.62353	3.58635		0.431278		0.0106581	0.558063	56.9894	7.06402	1.74292	2.03256	0.105544
				50	951.89		22.7464		8.65979	7.44367	10.6097		0.417727		0.0224301	0.559843	57.8465	7.34162	1.44175	2.07096	0.118237
16.5	0.5	QFM - 1	Initial Composition B	100	1178.12												51.2214	9.0168	7.29229	2.00023	0.05
				90	1082.77		1.9212		0	8.5611	0		0.0591385		0	0.940861	52.802	7.9658	4.0193	2.00386	0.0598348
				80	1047.01		10.8666		0	9.53323	0		0.237875		0	0.762125	54.4106	7.52577	3.08083	2.00259	0.0722888
				70	999.33		18.8511		0.912751	10.0332	0		0.327987		0.00119306	0.67082	56.0863	6.67498	2.16464	2.00504	0.0920251
				60	971.518		20.4852		5.05268	8.89677	5.02043		0.361269		0.00911561	0.629615	57.1405	6.89976	1.7482	2.03586	0.103712
				50	947.679		20.5108		8.38831	8.4988	11.6804		0.3593		0.0198721	0.620828	58.0573	7.15497	1.45042	2.07362	0.116411
13.2	0.4	QFM - 1	Initial Composition B	100	1172.85												51.2208	9.0167	7.2922	2.00023	0.05
				90	1072.54		0.597958		0	9.06614	0		0.0176887		0	0.982311	52.6488	7.85669	3.91181	2.00438	0.059628
				80	1032.41		9.45137		0	10.7744	0		0.189348		0	0.810652	54.79	7.18946	2.85398	2.00356	0.0738908
				70	984.263		17.4359		1.46226	10.8755	0.860602		0.28832		0.00189374	0.709786	56.4908	6.41271	1.99664	2.01024	0.0946828
				60	964.2		17.9802		5.00262	10.0818	6.78908		0.3012		0.00844182	0.690358	57.4065	6.7171	1.71195	2.04154	0.103537
				50	940.125		18.4676		8.40522	9.47941	13.1312		0.308886		0.0186205	0.672493	58.3835	6.93713	1.4203	2.07922	0.116805
9.9	0.3	QFM - 1	Initial Composition B	100	1167.38												51.2201	9.01659	7.29211	2.00023	0.05
				90	1059.63		0		0	9.64861	0		0		0	1	52.6197	7.72617	3.73509	2.00479	0.0602335
				80	1019.72		8.00185		0	11.7561	0		0.150258		0	0.849742	55	6.92815	2.69298	2.00439	0.0748833
				70	979.816		14.3473		0.591765	12.4708	1.60192		0.223866		0.000678103	0.775455	56.5576	6.1551	1.99424	2.01174	0.0931087
				60	955.871		15.6577		4.95596	11.2233	8.30203		0.249765		0.00779972	0.742436	57.7037	6.49157	1.66358	2.0539	0.103991
				50	939.908		16.295		7.35024	10.6451	12.4172		0.261156		0.0139317	0.724913	58.3938	6.63834	1.47181	2.0834	0.11278
6.6	0.2	QFM - 1	Initial Composition B	100	1161.69												51.2221	9.01517	7.28365	2.00013	0.05
				90	1049.82		0		0	9.96007	0		0		0	1	52.6736	7.65769	3.6254	2.00496	0.060878
				80	1005.88		7.47136		0	12.4429	0		0.132591		0	0.867409	55.1523	6.70349	2.53161	2.00487	0.0766751
				70	969.918		11.626		0.57809	13.8075	3.36178		0.172454		0.000621089	0.826925	56.8681	5.93248	1.91254	2.02072	0.0937786
				60	947.944		13.3842		4.68221	12.4056	9.23165		0.203755		0.0067381	0.789507	57.9592	6.21482	1.62208	2.05875	0.104256
				50	933.96		14.2256		6.87327	11.7466	12.7291		0.218421		0.011676	0.769903	58.5974	6.33442	1.45851	2.08419	0.112136
Abbreviations: Grt = garnet, Cpx = clinopyroxene, Opx = orthopyroxene, Bt = biotite, Ol = olivine, Pl = plagioclase, Mag = magnetite.

## Sheet: Table S10
Table S10 Modeling results from pMELTS calculation of Initial Composition A under a constant fO2 of QFM + 1 and 4 wt% initial water content
Thickness (Km)	Pressure (GPa)	fO2	Starting composition	Melt fraction (wt%)	T (℃)	Mineral assemblages (wt%)							Fe fractionated (Femineral/Fecumulate)						Mlel compositions
						Grt	Cpx	Opx	Bt	Ol	Pl	Mt	Grt	Cpx	Opx	Bt	Ol	Mt	SiO2	MgO	FeOT	Sm/Yb	δ56Fe
65	2	QFM+1	Initial Composition A	100	1318.4														53.7397	8.2277	7.66884	2	0.05
				90	1285.29	0	9.99501						0	1					54.2569	7.34033	7.82405	1.99791	0.056134
				80	1258.2	5.53544	14.8848						0.358515	0.641485					55.5639	6.19158	7.67657	2.75202	0.0691902
				70	1225.09	11.1378	19.1744						0.47662	0.52338					57.3052	4.97567	7.24109	3.97174	0.0882657
				60	1179.94	17.0469	23.081						0.552188	0.447812					59.7601	3.64586	6.3012	6.17959	0.120414
				50	1110.7	23.1507	26.6353						0.618224	0.3817					63.3263	2.20038	4.50277	10.6257	0.186268
61.75	1.9	QFM+1	Initial Composition A	100	1306.89														53.7392	8.22763	7.66877	2	0.05
				90	1273.98	0	9.86894						0	1					54.2379	7.34011	7.82416	1.99794	0.0561202
				80	1244.06	3.24183	16.726						0.225748	0.774252					55.3071	6.2685	7.74487	2.40752	0.0675126
				70	1211.15	9.16603	20.7656						0.409578	0.590422					57.0451	5.03576	7.3075	3.5098	0.0868389
				60	1166.27	15.4197	24.3967						0.514393	0.485607					59.497	3.68754	6.36003	5.53181	0.119471
				50	1097.46	21.3284	27.503						0.591029	0.408509					63.2553	2.13358	4.57416	9.27979	0.185977
58.5	1.8	QFM+1	Initial Composition A	100	1295.31														53.7386	8.22754	7.66869	2	0.05
				90	1262.37	0	9.76437						0	1					54.2206	7.33843	7.82457	1.99796	0.0561225
				80	1229.43	0.946259	18.5676						0.0711667	0.928833					55.051	6.34078	7.81339	2.10769	0.0657675
				70	1196.48	7.24197	22.3717						0.33755	0.66245					56.7993	5.08386	7.36962	3.11345	0.0855284
				60	1148.57	14.2564	25.9008						0.48197	0.51803					59.4302	3.63317	6.32923	5.13281	0.121541
				50	1085.68	19.4285	28.2969						0.560602	0.438527					63.0737	2.10656	4.70085	8.54291	0.183401
55.25	1.7	QFM+1	Initial Composition A	100	1283.46														53.738	8.22745	7.66861	2	0.05
				90	1250.51	0	9.66112						0	1					54.2037	7.33719	7.82508	1.99798	0.0561263
				80	1214.56	0	19.598						0	1					54.9651	6.31224	7.83699	1.99565	0.0655709
				70	1178.61	5.80256	24.2111						0.274752	0.725248					56.7013	5.03148	7.38228	2.85166	0.086013
				60	1133.67	12.7133	27.1861						0.442122	0.557878					59.185	3.66073	6.37825	4.62425	0.120912
				50	1070.76	17.6783	29.1485						0.530006	0.468584					63.0455	2.02649	4.76202	7.15264	0.183747
52	1.6	QFM+1	Initial Composition A	100	1271.39	0	0	0											53.7374	8.22735	7.66852	2	0.05
				90	1235.45	0	10.4617	0					0	1	0				54.2424	7.24845	7.83479	1.99781	0.0568391
				80	1199.5	0	19.6561	0.647045					0	0.958519	0.041481				55.0018	6.14155	7.81734	1.99549	0.0667382
				70	1160.57	3.20715	25.2369	1.69074					0.15664	0.773698	0.0696616				56.4511	4.82213	7.39422	2.42954	0.0854395
				60	1118.64	10.7048	28.2461	0					0.391058	0.608554	0				59.0592	3.58799	6.49387	4.05431	0.119293
				50	1055.74	15.9429	29.9616	0					0.497247	0.500727	0				62.9948	1.9558	4.83634	6.32908	0.183604
48.75	1.5	QFM+1	Initial Composition A	100	1258.99	0	0	0	0										53.7367	8.22725	7.66842	2	0.05
				90	1223.09	0	10.3446	0	0				0	1	0	0			54.2243	7.24889	7.83557	1.99783	0.0568416
				80	1187.19	0	19.1477	1.03653	0				0	0.932947	0.0670534	0			54.9687	6.08141	7.80992	1.99552	0.0669719
				70	1142.32	0.252527	26.094	3.76378	0				0.012835	0.825755	0.16141	0			56.1592	4.59287	7.41606	2.02419	0.0842027
				60	1100.44	8.77602	29.2222	0.237031	2.09543				0.335569	0.655859	0.00755256	0.00101898			59.1149	3.38832	6.563	3.5852	0.119546
				50	1040.61	14.2224	30.7362	0	4.94289				0.462063	0.535211	0	0.00272663			62.9208	1.894	4.92411	5.6027	0.182952
45.5	1.4	QFM+1	Initial Composition A	100	1246.19														53.7359	8.22713	7.66832	2	0.05
				90	1210.07	0	10.3476	0	0				0	1	0	0			54.2139	7.23804	7.83764	1.99783	0.056943
				80	1173.94	0	18.7642	1.47128	0				0	0.904825	0.0951751	0			54.9515	5.99709	7.79868	2.00254	0.067451
				70	1128.79	0	25.7383	4.30515	0				0	0.813562	0.186438	0			56.1135	4.51061	7.39882	2.01486	0.0848073
				60	1083.63	6.17892	29.8508	1.25	2.99143				0.249717	0.706145	0.0424992	0.00163854			58.9464	3.21392	6.66237	3.03237	0.11754
				50	1023.43	12.6486	31.5107	0	5.90391				0.427081	0.569343	0	0.00357666			62.9359	1.80552	4.96797	5.02064	0.184211
42.25	1.3	QFM+1	Initial Composition A	100	1233.4														53.7351	8.227	7.6682	2	0.05
				90	1197.36	0	10.1749	0	0			0	0	1	0	0		0	54.1933	7.24545	7.83814	1.99787	0.0569013
				80	1161.31	0	18.2185	1.84793	0			0	0	0.879143	0.120857	0		0	54.9142	5.94537	7.79108	2.00437	0.0676565
				70	1116.26	0	25.1739	4.63734	0.0235442			0	0	0.796709	0.203278	0		0	56.0735	4.46493	7.38899	2.0167	0.0852777
				60	1068.2	2.42501	30.4365	2.46343	3.72757			0.684913	0.09567	0.690703	0.0814661	0.00193199		0.130229	58.9535	3.0854	6.35738	2.3742	0.103502
				50	1005.13	10.5864	32.2696	0	6.83348			0.426322	0.358029	0.574175	0	0.0041046		0.0636916	63.1275	1.71023	4.74063	4.33866	0.176368
39	1.2	QFM+1	Initial Composition A	100	1220.12														53.7342	8.22686	7.66808	2	0.05
				90	1184.22	0	10.0438	0	0			0	0	1	0	0		0	54.1758	7.24951	7.83917	1.9979	0.0568939
				80	1148.32	0	17.6915	2.22966	0			0	0	0.852808	0.147192	0		0	54.8796	5.89101	7.78243	2.00623	0.0679131
				70	1103.44	0	24.744	4.28928	0.856743			0	0	0.804103	0.195408	0.000488532		0	56.1634	4.38659	7.45576	2.01869	0.0851671
				60	1049.59	0	30.9507	2.85269	4.68244			1.53075	0	0.639756	0.0877967	0.00216628		0.270281	59.4026	2.89577	5.85751	2.03058	0.0897448
				50	986.761	7.9941	33.0058	0	7.70059			1.20534	0.264112	0.557104	0	0.00420386		0.17458	63.3712	1.63262	4.34728	3.60381	0.157133
35.75	1.1	QFM+1	Initial Composition A	100	1206.45														53.7332	8.22672	7.66794	2	0.05
				90	1170.39	0	9.72116	0.368638	0			0	0	0.950591	0.0494089	0		0	54.1569	7.18196	7.83348	1.99955	0.0571251
				80	1134.34	0	17.2951	2.65367	0			0	0	0.824808	0.175192	0		0	54.8618	5.81258	7.7695	2.00826	0.0684387
				70	1092.28	0	24.0497	3.81778	1.54395			0.310379	0	0.746306	0.168311	0.000823692		0.0845589	56.3796	4.3616	7.31641	2.01984	0.081565
				60	1035.2	0	30.5115	2.27656	5.43059			2.01554	0	0.588338	0.0667142	0.00228005		0.342668	59.8421	2.80962	5.53475	2.03179	0.082822
				50	963.092	5.76961	33.7882	0	8.67606			1.94455	0.18648	0.537533	0	0.00437478		0.271612	63.8078	1.48974	3.87564	3.08296	0.140431
32.5	1	QFM+1	Initial Composition A	100	1200.59														53.7325	8.22661	7.66784	2	0.05
				90	1155.5	0	8.53567	0	0	1.56444		0	0	0.730789	0	0	0.269211	0	54.3812	6.74268	7.72894	1.99898	0.0570733
				80	1116.42	0	17.6458	1.38606	0	1.376		0	0	0.78822	0.0869301	0	0.12485	0	55.1863	5.52364	7.66408	2.00312	0.0691267
				70	1080.35	0	23.4326	3.23564	2.28033	0		0.834654	0	0.656256	0.13079	0.00105639	0	0.211897	56.7555	4.31533	7.01983	2.02092	0.0759212
				60	1023.24	0	29.8185	1.76295	6.01277	0		2.444	0	0.542734	0.0496409	0.00228398	0	0.405341	60.1279	2.78571	5.2859	2.03244	0.0750444
				50	939.076	3.46724	34.5313	0	9.58271	0		2.71048	0.110059	0.518362	0	0.00441304	0	0.367166	64.1684	1.36909	3.44004	2.62	0.117491
29.25	0.9	QFM+1	Initial Composition A	100	1196.09														53.7318	8.2265	7.66775	2	0.05
				90	1142.08		6.78235	0	0	2.87443	0	0		0.534228	0	0	0.465772	0	54.5231	6.36725	7.61856	1.99999	0.0567956
				80	1103.07		16.359	0	0	3.3525	0	0		0.70127	0	0	0.29873	0	55.5123	5.20173	7.50792	1.99812	0.0682119
				70	1067.06		22.9588	2.61944	3.09463	0	0	1.40163		0.574214	0.0962466	0.00123225	0	0.328307	57.2012	4.23626	6.68043	2.02223	0.0697079
				60	1010.04		29.2071	1.22434	6.643	0	0	2.88937		0.499065	0.0330058	0.00226889	0	0.46566	60.4561	2.74441	5.01115	2.03322	0.0666234
				50	929.019		33.9928	0	10.2881	0	1.78686	3.85681		0.480399	0	0.0038654	0	0.515736	64.0289	1.49535	3.31805	2.05228	0.0648237
26	0.8	QFM+1	Initial Composition A	100	1191.45														53.7311	8.22639	7.66764	2	0.05
				90	1125.16		5.95447	0	0	4.15677	0	0		0.405645	0	0	0.594355	0	54.7204	5.90918	7.50314	2.0008	0.0573972
				80	1085.99		15.5877	0	0	4.53141	0	0		0.618131	0	0	0.381869	0	55.7879	4.79964	7.34584	1.9989	0.0694935
				70	1049.83		22.9617	0	3.75905	1.68404	0	1.96346		0.502225	0	0.00129576	0.0809482	0.415531	58.0636	3.97694	6.17876	2.0139	0.062067
				60	995.591		28.6729	0.665718	7.31128	0	0	3.34794		0.457771	0.0171345	0.00223157	0	0.522863	60.8209	2.68716	4.71349	2.03409	0.0573677
				50	929.302		31.1028	0	10.49	0	4.20961	4.31145		0.41857	0	0.00341576	0	0.578014	63.9797	1.66132	3.39085	2.06144	0.0449678
22.75	0.7	QFM+1	Initial Composition A	100	1186.56														53.7303	8.22626	7.66753	2	0.05
				90	1108.67		4.93716	0	0	5.38301	0	0		0.300652	0	0	0.699348	0	54.8935	5.49361	7.37817	2.00162	0.0578683
				80	1072.72		14.0759	0	0	5.46873	0	0.387712		0.47352	0	0	0.39859	0.127889	56.1434	4.51695	6.95854	2.00016	0.0663936
				70	1036.76		21.5006	0	3.94617	2.37982	0	2.28339		0.43204	0	0.00124979	0.107744	0.458966	58.3878	3.75561	5.84482	2.01579	0.0575725
				60	979.839		28.2139	0.0919379	8.0085	0	0	3.81603		0.419087	0.0022546	0.00217077	0	0.576487	61.2175	2.61504	4.39548	2.03504	0.0470536
				50	928.908		28.5796	0	10.6662	0	6.15681	4.70945		0.36589	0	0.00299769	0	0.631112	63.9495	1.83111	3.43621	2.06893	0.0283703
19.5	0.6	QFM+1	Initial Composition A	100	1181.48														53.7294	8.22613	7.66741	2	0.05
				90	1094.35		3.19315		0	6.57445	0	0		0.183674		0	0.816326	0	54.9931	5.16393	7.24913	2.00256	0.0576423
				80	1058.3		12.752		0	6.33742	0	0.87051		0.359229		0	0.393872	0.246899	56.5588	4.22349	6.50169	2.00144	0.062413
				70	1022.24		20.2558		4.27691	2.92377	0	2.64836		0.372221		0.00123421	0.123999	0.502546	58.7554	3.52122	5.48263	2.01824	0.052397
				60	965.158		27.3596		8.50318	0.0103879	0	4.1908		0.380583		0.00208234	0.000359375	0.616975	61.4893	2.52776	4.11353	2.03753	0.0377451
				50	926.1		26.2632		10.9084	0	8.08323	5.10695		0.317732		0.0026316	0	0.679636	64.0374	1.98341	3.427	2.07684	0.0128059
16.25	0.5	QFM+1	Initial Composition A	100	1176.41														53.7285	8.226	7.66729	2	0.05
				90	1076.96		2.29219		0	7.71213	0	0		0.120449		0	0.879551	0	55.1492	4.77749	7.1108	2.00332	0.0582796
				80	1043.82		11.3371		0	7.17576	0	1.33105		0.27552		0	0.390771	0.333709	56.9351	3.94888	6.06227	2.0027	0.0580391
				70	1007.66		18.9665		4.60094	3.43918	0	2.99835		0.321056		0.0012114	0.137361	0.540372	59.0865	3.3017	5.13241	2.02062	0.04679
				60	959.442		24.365		8.58935	0.791441	2.05832	4.43148		0.323334		0.00194908	0.0265807	0.648136	61.6518	2.54116	4.0462	2.04466	0.0283268
				50	923.281		24.0472		11.0448	0.156039	9.62676	5.43035		0.275704		0.0023153	0.00485069	0.71713	64.1112	2.11661	3.4021	2.08295	1.77024e-05
13	0.4	QFM+1	Initial Composition A	100	1171.13														53.7276	8.22585	7.66715	2	0.05
				90	1060.44		1.14767		0	8.72511	0	0.286833		0.0499733		0	0.825452	0.124575	55.4195	4.43156	6.80135	2.00436	0.0564849
				80	1027.53		10.3153		0.547805	7.57041	0	1.88959		0.216979		0.000162403	0.362858	0.420001	57.4033	3.66743	5.61481	2.00595	0.0522846
				70	991.633		17.8424		5.05208	3.82746	0	3.3819		0.27755		0.00120653	0.143631	0.577612	59.4532	3.07444	4.76222	2.02351	0.0402108
				60	955.733		21.1532		8.43551	1.77291	3.89081	4.59996		0.27014		0.00178326	0.058048	0.670029	61.7215	2.56008	3.9991	2.05002	0.0206594
				50	919.833		21.5365		10.9847	0.836269	11.0763	5.61464		0.23623		0.00211525	0.0251876	0.736467	64.2389	2.15129	3.34962	2.08789	-0.00899477
9.75	0.3	QFM+1	Initial Composition A	100	1165.86														53.7266	8.2257	7.66701	2	0.05
				90	1048.91		0		0	9.29283	0	0.811975		0		0	0.712432	0.287568	55.728	4.23173	6.41172	2.00542	0.0520657
				80	1012.93		8.71351		0.875928	8.14229	0	2.34313		0.165185		0.000227068	0.355769	0.478819	57.7251	3.43583	5.23102	2.00841	0.0463869
				70	976.946		16.3918		5.34806	4.32583	0	3.70561		0.237622		0.00116403	0.154078	0.607136	59.711	2.88334	4.43738	2.02573	0.0335003
				60	949.959		18.0335		8.32703	2.76535	5.74028	4.80684		0.220085		0.00162942	0.0877486	0.690537	61.8936	2.53312	3.88986	2.05574	0.0125594
				50	913.975		19.0819		10.9683	1.54335	12.6361	5.81975		0.199289		0.00194078	0.0449788	0.753791	64.4768	2.14027	3.24224	2.09359	-0.0187587
6.5	0.2	QFM+1	Initial Composition A	100	1160.39														53.7255	8.22553	7.66687	2	0.05
				90	1046.24		0		0	9.09619	0	0.928327		0		0	0.678174	0.321826	55.7588	4.28934	6.38419	2.00544	0.0509466
				80	998.18		6.96236		1.18607	8.7232	0	2.79395		0.120273		0.000269504	0.350122	0.529336	58.0147	3.21672	4.8568	2.01082	0.0397798
				70	968.141		13.0211		5.29188	5.44779	1.89492	4.00463		0.178256		0.00104942	0.185345	0.63535	59.9663	2.78751	4.23743	2.0316	0.025369
				60	941.105		15.1256		8.39468	3.64942	7.79691	5.09915		0.174046		0.00149988	0.111113	0.713341	62.2433	2.45881	3.70531	2.06306	0.00255535
				50	923.082		16.1753		9.64362	3.18177	14.5386	5.7497		0.167522		0.00166704	0.091389	0.739422	64.3701	2.19925	3.28458	2.09432	-0.0167834
Abbreviations: Grt = garnet, Cpx = clinopyroxene, Opx = orthopyroxene, Bt = biotite, Ol = olivine, Pl = plagioclase, Mag = magnetite.

## Sheet: Table S11
Table S11 Modeling results from pMELTS calculation of Initial Composition A under a constant fO2 of QFM and 4 wt% initial water content
Thickness (Km)	Pressure (GPa)	fO2	Starting composition	Melt fraction (wt%)	T (℃)	Mineral assemblages (wt%)							Fe fractionated (Femineral/Fecumulate)						Mlel compositions
						Grt	Cpx	Opx	Bt	Ol	Pl	Mt	Grt	Cpx	Opx	Bt	Ol	Mt	SiO2	MgO	FeOT	Sm/Yb	δ56Fe
65	2	QFM	Initial Composition A	100	1313.67														53.7667	8.23184	7.6726	1.99981	0.05
				90	1289.57	2.3399	6.78705						0.377967	0.622033					54.3572	7.33808	7.78316	2.27047	0.0566864
				80	1261.46	8.33519	11.8471						0.563412	0.436588					55.6953	6.12056	7.62417	3.24117	0.0708405
				70	1229.33	13.8166	16.1143						0.621725	0.378275					57.3592	4.93589	7.19581	4.6886	0.0899927
				60	1185.15	19.5993	20.1692						0.664684	0.335316					59.7606	3.63483	6.26249	7.31692	0.122503
				50	1116.88	25.6395	24.0465						0.707622	0.292378					63.3067	2.23211	4.43821	12.6039	0.189819
61.75	1.9	QFM	Initial Composition A	100	1302.34														53.7664	8.23179	7.67255	1.99988	0.05
				90	1272.32	0.452476	9.48804						0.0773793	0.922621					54.2155	7.26079	7.87611	2.0481	0.0559767
				80	1248.3	5.8378	13.5846						0.43938	0.56062					55.3689	6.20947	7.73075	2.79845	0.0683725
				70	1215.27	11.8414	17.7763						0.560294	0.439706					57.0888	4.96946	7.28421	4.14214	0.0884338
				60	1170.23	18.0868	21.638						0.630699	0.369301					59.5552	3.62835	6.30629	6.61391	0.122475
				50	1101.17	24.1747	25.0423						0.687246	0.312403					63.2983	2.13877	4.44159	11.4027	0.192579
58.5	1.8	QFM	Initial Composition A	100	1290.96														53.766	8.23173	7.6725	1.99989	0.05
				90	1260.89	0	9.58812						0	1					54.1452	7.28877	7.88793	1.99799	0.0554964
				80	1230.81	4.13514	15.8799						0.321584	0.678416					55.2375	6.13711	7.80062	2.53752	0.0679788
				70	1197.73	10.3807	19.727						0.501886	0.498114					56.9839	4.89748	7.31803	3.79207	0.0888889
				60	1152.62	16.8792	23.2171						0.59864	0.40136					59.4766	3.56245	6.28999	6.12255	0.124473
				50	1086.46	22.49	25.8827						0.663853	0.335218					63.2823	2.04205	4.49613	10.1431	0.193532
55.25	1.7	QFM	Initial Composition A	100	1279.25														53.7655	8.23166	7.67244	1.9999	0.05
				90	1249.15	0	9.49424						0	1					54.1304	7.28764	7.88523	1.99801	0.055527
				80	1216.04	1.75873	17.7205						0.151851	0.848149					54.9443	6.19029	7.90177	2.20961	0.0656995
				70	1182.93	8.40076	21.3411						0.428453	0.571547					56.7059	4.93059	7.40883	3.34977	0.0871176
				60	1137.78	15.3037	24.565						0.560553	0.439447					59.2217	3.57672	6.3547	5.50263	0.123696
				50	1074.58	20.6533	26.6192						0.636544	0.361936					63.0728	2.01152	4.64493	8.86888	0.190395
52	1.6	QFM	Initial Composition A	100	1267.25														53.2049	8.23159	7.67237	2	0.05
				90	1234.14	0	10.3047	0					0	1	0				53.3396	7.19193	7.89812	1.99783	0.0563181
				80	1198.02	0	19.0999	0.945302					0	0.930997	0.0690031				53.6496	5.9941	7.95037	2.00006	0.0654251
				70	1164.9	6.9128	23.1897	0.00466193					0.36138	0.63842	0.000200027				54.9811	4.863	7.44432	3.05831	0.0874256
				60	1122.76	13.5705	25.7929	0					0.517702	0.482118	0				56.7939	3.55723	6.44757	4.90054	0.122562
				50	1059.54	18.9809	27.403	0					0.60905	0.388643	0				59.9662	1.92903	4.72387	7.88496	0.190628
48.75	1.5	QFM	Initial Composition A	100	1254.98														53.2044	8.23151	7.6723	2	0.05
				90	1221.88	0	10.2056	0	0				0	1	0	0			53.3272	7.19154	7.89553	1.99785	0.056358
				80	1185.79	0	18.5507	1.38835	0				0	0.898042	0.101958	0			53.6222	5.93202	7.93372	2.00221	0.0657377
				70	1146.68	4.32263	23.9624	1.87792	0				0.235608	0.68007	0.0843218	0			54.6915	4.62756	7.48191	2.61747	0.0864011
				60	1107.57	11.494	26.7441	0	1.38693				0.466101	0.532992	0	0.000906589			56.7289	3.44974	6.60972	4.27923	0.120213
				50	1044.4	17.3193	28.1525	0	4.40505				0.579304	0.417471	0	0.00322504			59.9466	1.85517	4.81571	7.01008	0.190194
45.5	1.4	QFM	Initial Composition A	100	1242.38														53.2039	8.23142	7.67222	2	0.05
				90	1209.35	0	10.11	0	0				0	1	0	0			53.3151	7.19139	7.89317	1.99787	0.0564045
				80	1173.31	0	17.9993	1.83167	0				0	0.864723	0.135277	0			53.5948	5.8707	7.91631	2.00436	0.0660732
				70	1128.26	1.59853	24.6993	3.81183	0				0.0914634	0.727986	0.18055	0			54.3913	4.40335	7.53048	2.22175	0.0848502
				60	1089.21	9.75538	27.7119	0.0537524	2.57679				0.416141	0.580038	0.00191727	0.0019028			56.801	3.25572	6.7103	3.83304	0.120156
				50	1029.14	15.6658	28.8678	0	5.28682				0.546968	0.448741	0	0.00429022			59.907	1.79001	4.92168	6.23176	0.18921
42.25	1.3	QFM	Initial Composition A	100	1229.47														53.2033	8.23132	7.67213	2	0.05
				90	1197.33	0	9.62412	0.180483	0				0	0.972367	0.0276332	0			53.2941	7.19038	7.88278	1.99875	0.0562195
				80	1161.16	0	17.3371	2.23939	0				0	0.832507	0.167493	0			53.5614	5.83131	7.89973	2.00636	0.0661224
				70	1112.95	0	24.7846	4.91887	0.180978				0	0.75531	0.244533	0.000156737			54.2272	4.27187	7.57737	2.01891	0.0834517
				60	1072.77	7.21537	28.1905	1.07219	3.40084				0.32815	0.627595	0.0413773	0.00287726			56.6274	3.09189	6.85133	3.24957	0.117019
				50	1012.5	14.115	29.5693	0	6.18098				0.513649	0.480778	0	0.0055731			59.9073	1.71066	5.00079	5.5871	0.189232
39	1.2	QFM	Initial Composition A	100	1216.41														53.2033	8.23132	7.67213	2	0.05
				90	1183.26	0	9.34977	0.703243	0				0	0.896368	0.103632	0			53.3576	6.72096	7.91304	2.00107	0.0566761
				80	1147.1	0	16.982	2.74254	0				0	0.796612	0.203388	0			53.8501	5.01501	7.78196	2.00875	0.0668338
				70	1098.88	0	24.4885	4.63301	1.08875				0	0.760258	0.238745	0.000997074			56.6274	3.09189	6.85133	2.02154	0.0838971
				60	1053.68	5.05776	28.7614	1.92838	4.34882				0.242801	0.673045	0.0799198	0.00423329			59.9073	1.71066	5.00079	2.83012	0.11594
				50	996.429	12.5231	30.2254	0	7.01119				0.476315	0.516667	0	0.00701822			63.078	0.775019	2.76661	4.98715	0.187913
35.75	1.1	QFM	Initial Composition A	100	1209.57														53.7621	8.23114	7.67197	2	0.05
				90	1170.5	0	8.20747	0	0	1.32853			0	0.71809	0	0	0.28191		54.2711	6.84216	7.76641	1.99893	0.0561832
				80	1131.43	0	16.8674	3.31948	0	0			0	0.75972	0.24028	0	0		54.6865	5.59202	7.84941	2.01145	0.0680282
				70	1086.34	0	23.9262	4.3803	1.84806	0			0	0.762758	0.235466	0.0017754	0		56.0003	4.08058	7.69092	2.02371	0.0836923
				60	1035.25	2.63682	29.2243	2.96431	5.18355	0			0.134698	0.726299	0.133163	0.00583939	0		58.4582	2.69699	7.06053	2.42052	0.11328
				50	978.144	11.1154	30.8722	0	7.87013	0			0.439906	0.551333	0	0.00876105	0		62.664	1.56832	5.17192	4.519	0.189092
32.5	1	QFM	Initial Composition A	100	1205.08														53.7617	8.23107	7.6719	2	0.05
				90	1154.23	0	7.22925	0	0	2.76996			0	0.509283	0	0	0.490717		54.4976	6.36067	7.62954	1.99985	0.0567648
				80	1115.35	0	16.6343	0	0	3.17592			0	0.671475	0	0	0.328525		55.33	5.18701	7.58875	1.99796	0.066951
				70	1073.48	0	23.3545	4.14029	2.60495	0			0	0.764972	0.232401	0.00262661	0		56.0786	4.01334	7.75138	2.02593	0.0834917
				60	1016.65	0.0864892	29.6337	4.10558	5.96611	0			0.00472061	0.786457	0.201001	0.00782149	0		58.2411	2.52888	7.18942	2.05338	0.109785
				50	959.819	9.68435	31.5211	0	8.68346	0			0.399299	0.589939	0	0.010762	0		62.6329	1.49523	5.24523	4.08515	0.189548
29.25	0.9	QFM	Initial Composition A	100	1200.59														53.7612	8.23099	7.67183	2	0.05
				90	1140.83	0	5.41336	0	0	4.13023			0	0.335718	0	0	0.664282		54.6576	5.99657	7.47469	2.0009	0.0567031
				80	1100.99	0	15.2446	0	0	4.4206			0	0.565499	0	0	0.434501		55.5551	4.8506	7.41058	1.99892	0.0674364
				70	1057.16	0	23.2741	1.99603	3.21812	1.61952			0	0.743339	0.111736	0.00331428	0.141611		56.5766	3.79078	7.61909	2.01895	0.0829597
				60	1001.39	0	29.1849	4.07099	6.64417	0			0	0.784939	0.205864	0.00919687	0		58.3653	2.43253	7.19408	2.0448	0.111182
				50	941.63	8.04396	32.0832	0.245392	9.39642	0			0.346009	0.631088	0.0098902	0.0130124	0		62.507	1.42697	5.33142	3.63636	0.188705
26	0.8	QFM	Initial Composition A	100	1195.9														53.7606	8.23091	7.67175	2	0.05
				90	1123.92	0	4.52	0	0	5.44507	0	0	0	0.237255	0	0	0.762745	0	54.8624	5.55391	7.3175	2.00174	0.0574729
				80	1084.93	0	14.2166	0	0	5.62546	0	0	0	0.480594	0	0	0.519406	0	55.8127	4.49135	7.21178	1.99978	0.0685401
				70	1039.95	0	22.8186	0	3.56833	3.70571	0	0	0	0.682982	0	0.00367831	0.31334	0	57.1763	3.47773	7.35316	2.01195	0.08293
				60	985.962	0	28.7645	3.47237	7.34662	0	0	0.565165	0	0.711373	0.164672	0.00910273	0	0.114852	58.8341	2.34875	6.80405	2.04581	0.104841
				50	925.98	2.14725	31.3535	2.16346	10.102	0	2.83423	1.43605	0.0904707	0.59221	0.0854404	0.0127455	0	0.219133	62.1579	1.42227	5.12059	2.42661	0.134373
22.75	0.7	QFM	Initial Composition A	100	1191.05														53.76	8.23082	7.67167	2	0.05
				90	1109.8		2.74047	0	0	6.72614	0	0		0.129724	0	0	0.870276	0	54.9964	5.21682	7.1472	2.00275	0.0574991
				80	1070.67		12.7839	0	0	6.76872	0	0		0.402756	0	0	0.597244	0	56.0096	4.20016	7.01467	2.00069	0.0690993
				70	1025.53		21.5096	0	3.79511	4.6389	0	0		0.611734	0	0.00391266	0.384353	0	57.4445	3.23758	7.14893	2.01375	0.0838765
				60	971.355		28.2785	1.6667	7.86101	1.01434	0	1.08264		0.63968	0.0737805	0.00855296	0.0708573	0.207129	59.4377	2.26876	6.34556	2.0399	0.0957027
				50	926.211		28.3663	2.77411	10.405	0	6.16705	2.43668		0.511808	0.104831	0.0109322	0	0.372429	61.9347	1.61899	5.22435	2.08106	0.0933737
19.5	0.6	QFM	Initial Composition A	100	1186.21														53.7594	8.23072	7.67158	2	0.05
				90	1090.44		2.42329	0	0	7.92469	0	0		0.0985955	0	0	0.901404	0	55.2194	4.76778	6.97074	2.00342	0.0589789
				80	1054.53		11.7173	0	0	7.9005	0	0		0.34114	0	0	0.65886	0	56.2582	3.88266	6.7927	2.00152	0.0704792
				70	1009.64		20.4231	0	4.14989	5.46599	0	0		0.552488	0	0.00429754	0.443214	0	57.7484	2.98563	6.93345	2.01601	0.0856564
				60	955.768		27.1175	0	8.3429	2.38322	0.873235	1.54996		0.55791	0	0.00813333	0.155426	0.278531	60.1469	2.14327	5.8896	2.0373	0.0865964
				50	922.848		25.9296	1.62978	10.6895	0.734202	8.37172	3.01135		0.439134	0.058231	0.00937653	0.0416628	0.451596	62.2615	1.75224	5.13068	2.08405	0.0727202
16.25	0.5	QFM	Initial Composition A	100	1181.09														53.7587	8.23062	7.67149	2	0.05
				90	1076.06		0.532056		0	9.13033	0	0		0.0201149		0	0.979885	0	55.3076	4.47452	6.78933	2.00441	0.0590216
				80	1037.05		10.8879		0	9.02552	0	0		0.292358		0	0.707642	0	56.5585	3.55593	6.54327	2.0023	0.0724301
				70	995.039		19.0464		4.37444	6.37784	0	0		0.490056		0.00449263	0.505452	0	58.0316	2.76828	6.69728	2.0178	0.08697
				60	953.027		23.5127		8.16412	3.61459	3.00462	1.69624		0.461373		0.00737072	0.229122	0.302134	60.2679	2.1715	5.82029	2.04359	0.0794925
				50	920.018		23.4931		10.6733	2.39425	10.0963	3.26431		0.378158		0.00829182	0.130259	0.483291	62.6371	1.8267	5.02264	2.08097	0.0585956
13	0.4	QFM	Initial Composition A	100	1176.29														53.7581	8.23052	7.6714	2	0.05
				90	1061.82		0		0	9.93597	0	0		0		0	1	0	55.4195	4.20665	6.65336	2.00492	0.0598845
				80	1022.66		9.6971		0.0390784	10.0729	0	0		0.244531		2.86316e-05	0.75544	0	56.844	3.30057	6.31626	2.00327	0.0737441
				70	980.491		17.9586		4.68957	7.12752	0	0		0.441642		0.00480552	0.553553	0	58.3165	2.56267	6.47361	2.01984	0.0887433
				60	947.356		20.4891		8.207	4.55333	5.23162	1.99738		0.375803		0.00671907	0.274438	0.343039	60.5963	2.15026	5.63129	2.05131	0.0718773
				50	914.221		20.9759		10.7386	3.12326	12.019	3.5322		0.318418		0.0076254	0.163373	0.510583	62.9948	1.81634	4.8516	2.0886	0.0494767
9.75	0.3	QFM	Initial Composition A	100	1170.43														53.7572	8.23039	7.67128	2	0.05
				90	1055.9		0		0	9.95147	0	0		0		0	1	0	55.4203	4.19505	6.65823	2.00493	0.0599496
				80	1004.67		8.20958		0.51607	11.0877	0	0		0.195712		0.000374214	0.803914	0	57.2132	3.00723	6.0815	2.00606	0.0752453
				70	965.486		15.6628		5.05539	8.00633	1.15369	0.358447		0.346662		0.0046548	0.572782	0.0759013	58.7924	2.38615	6.08627	2.02563	0.0850887
				60	941.375		16.9746		8.06184	5.72008	7.19968	2.2997		0.289411		0.00582846	0.325217	0.379544	60.8679	2.12842	5.38322	2.05753	0.0636584
				50	908.222		18.0649		10.6855	4.03136	13.7495	3.79459		0.257098		0.00680161	0.201512	0.534589	63.3085	1.80436	4.64234	2.09493	0.0399009
6.5	0.2	QFM	Initial Composition A	100	1164.84														53.7564	8.23027	7.67117	2	0.05
				90	1051.27		0		0	9.90335	0	0		0		0	1	0	55.4086	4.20745	6.67525	2.00491	0.0599003
				80	988.513		6.63084		0.879335	12.0645	0	0		0.151194		0.000626465	0.84818	0	57.5162	2.76556	5.84987	2.00838	0.0765457
				70	958.626		12.0832		4.81686	9.31805	2.8298	0.665461		0.246061		0.00385826	0.617574	0.132507	59.0679	2.33158	5.77805	2.03036	0.0790152
				60	934.717		13.8965		7.95916	6.66994	8.8985	2.67163		0.219573		0.00502925	0.355284	0.420114	61.1561	2.09239	5.09019	2.06318	0.0549665
				50	919.773		15.0355		8.89683	6.33046	17.0611	3.62202		0.205388		0.00527106	0.300892	0.48845	63.52	1.84564	4.52181	2.09945	0.043419
Abbreviations: Grt = garnet, Cpx = clinopyroxene, Opx = orthopyroxene, Bt = biotite, Ol = olivine, Pl = plagioclase, Mag = magnetite.

## Sheet: Table S12
Table S12 Modeling results from pMELTS calculation of Initial Composition A under a constant fO2 of QFM - 1 and 4 wt% initial water content
Thickness (Km)	Pressure (GPa)	fO2	Starting composition	Melt fraction (wt%)	T (℃)	Mineral assemblages (wt%)						Fe fractionated (Femineral/Fecumulate)					Mlel compositions
						Grt	Cpx	Opx	Bt	Ol	Pl	Grt	Cpx	Opx	Bt	Ol	SiO2	MgO	FeOT	Sm/Yb	δ56Fe
65	2	QFM - 1	Initial Composition A	100	1310.94												53.7895	8.22271	7.67892	1.99974	0.05
				90	1289.94	4.43131	5.31331					0.62307	0.37693				54.5801	7.25137	7.70606	2.55292	0.0588141
				80	1262.94	10.1711	10.1221					0.675431	0.324569				55.8542	6.08131	7.53288	3.61832	0.0728925
				70	1232.95	15.3012	14.1598					0.700791	0.299209				57.3889	4.9697	7.1278	5.14227	0.0911766
				60	1187.96	21.1707	18.4409					0.726846	0.273154				59.8175	3.63799	6.18017	8.14116	0.124846
				50	1118.97	27.1176	22.5596					0.756749	0.243251				63.4106	2.22549	4.33684	14.0852	0.194258
61.75	1.9	QFM - 1	Initial Composition A	100	1300	0	0										53.7859	8.23478	7.67527	1.99976	0.05
				90	1272.93	2.53714	7.93446					0.386574	0.613426				54.4139	7.16435	7.81356	2.29979	0.0578914
				80	1248.87	7.89229	11.9893					0.574948	0.425052				55.5615	6.11492	7.64573	3.16309	0.0707924
				70	1212.78	14.2966	16.4919					0.653605	0.346395				57.4342	4.78369	7.11888	4.86882	0.0936849
				60	1170.68	19.9306	20.1006					0.697342	0.302658				59.7345	3.56144	6.17243	7.52681	0.126816
				50	1104.51	25.7219	23.5743		0.425078			0.738472	0.261293		0.000235603		63.2838	2.17366	4.36783	12.7565	0.195718
58.5	1.8	QFM - 1	Initial Composition A	100	1288.67												53.7856	8.23474	7.67523	1.99977	0.05
				90	1258.77	0	9.83819					0	1				54.1194	7.21779	7.92715	1.99791	0.0554596
				80	1231.87	6.12506	14.2087					0.468295	0.531705				55.3942	6.04438	7.73343	2.85549	0.0700866
				70	1201.97	11.7661	17.7596					0.587467	0.412533				56.9579	4.92429	7.28772	4.13163	0.0894371
				60	1157.12	18.2376	21.4377					0.662941	0.337059				59.4271	3.58926	6.26848	6.70025	0.125246
				50	1091.35	24.0035	24.3487		1.33952			0.717304	0.281876		0.000819473		63.1759	2.10136	4.46702	11.2878	0.194873
55.25	1.7	QFM - 1	Initial Composition A	100	1276.95												53.7853	8.23469	7.67519	1.99977	0.05
				90	1247.04	0	9.77384					0	1				54.1064	7.21352	7.92264	1.99793	0.0555306
				80	1217.12	3.78185	16.0454					0.322183	0.677817				55.0901	6.08028	7.85064	2.48809	0.067691
				70	1184.21	10.3041	19.6794					0.528521	0.471479				56.8325	4.84261	7.33497	3.78065	0.0897081
				60	1139.34	17.0276	22.9967					0.631216	0.368784				59.3318	3.51878	6.26238	6.1995	0.127157
				50	1076.51	22.3657	25.1369		2.30368			0.695141	0.303295		0.00156354		63.1414	2.00561	4.53699	10.0689	0.195471
52	1.6	QFM - 1	Initial Composition A	100	1265.04												53.2239	8.23464	7.67514	2	0.05
				90	1235.12	0	9.68758	0	0			0	1	0			53.2883	7.2121	7.91781	1.99795	0.0558408
				80	1199.21	1.81843	17.9639	0.417989	0			0.163673	0.805747	0.0305801			53.7393	5.95684	7.93544	2.22147	0.0669579
				70	1169.29	8.26478	21.2833	0	0			0.451022	0.548978	0			54.9549	4.86874	7.44433	3.32575	0.0878551
				60	1124.41	15.3925	24.3141	0	0.0636943			0.592361	0.407596	0	4.29363e-05		56.8339	3.5221	6.34727	5.54827	0.126346
				50	1061.57	20.7362	25.8926	0	3.23816			0.671132	0.326425	0	0.00244316		60.0081	1.91885	4.61936	8.97811	0.196001
48.75	1.5	QFM - 1	Initial Composition A	100	1252.93												53.2235	8.23458	7.67509	2	0.05
				90	1223.02	0	9.57694	0	0			0	1	0	0		53.2771	7.21389	7.91263	1.99797	0.0558769
				80	1184.14	0	18.1914	1.77171	0			0	0.861095	0.138905	0		53.5066	5.79992	7.98809	2.00407	0.0655232
				70	1151.24	6.13548	22.4229	1.12827	0			0.348647	0.598977	0.0523758	0		54.703	4.69522	7.49536	2.92396	0.0870792
				60	1109.37	13.3615	25.2336	0	1.12059			0.54709	0.452059	0	0.000851385		56.7581	3.40887	6.51787	4.85652	0.123917
				50	1046.56	19.1138	26.6151	0	4.14124			0.645016	0.351504	0	0.00347934		59.9832	1.84108	4.71525	8.00242	0.195591
45.5	1.4	QFM - 1	Initial Composition A	100	1240.43												53.2231	8.23452	7.67504	2	0.05
				90	1210.3	0	9.35617	0.234112	0			0	0.961215	0.0387847	0		53.2614	7.17275	7.90344	1.99903	0.0560771
				80	1171.14	0	17.7165	2.28327	0			0	0.821791	0.178209	0		53.4848	5.71761	7.9625	2.00653	0.0660986
				70	1131.97	3.77957	23.2001	2.94281	0			0.223084	0.634086	0.14283	0		54.4381	4.43914	7.53056	2.5391	0.0863998
				60	1092.81	11.4805	26.1569	0	2.21651			0.499068	0.499022	0	0.00190959		56.7376	3.26458	6.67068	4.29936	0.122277
				50	1032.56	17.418	27.2866	0	4.96885			0.615207	0.380144	0	0.00464894		59.8845	1.79205	4.8605	7.07803	0.193096
42.25	1.3	QFM - 1	Initial Composition A	100	1227.54												53.2227	8.23445	7.67498	2	0.05
				90	1197.49	0	8.83397	0.741902	0			0	0.87917	0.12083	0		53.2376	7.10013	7.88517	2.00135	0.0563546
				80	1158.43	0	17.1412	2.76399	0			0	0.783951	0.216049	0		53.4585	5.65509	7.93666	2.00887	0.066555
				70	1113.35	1.15309	23.869	4.72538	0.124424			0.0721274	0.682598	0.245141	0.00013354		54.1526	4.21378	7.60607	2.16742	0.0844551
				60	1077.29	9.09149	26.7101	0.669341	3.06657			0.423785	0.546759	0.0264245	0.00303126		56.5545	3.13578	6.85107	3.67547	0.118675
				50	1017.19	15.8088	27.9502	0	5.81553			0.583831	0.410091	0	0.00607796		59.8247	1.72806	4.98212	6.30885	0.19172
39	1.2	QFM - 1	Initial Composition A	100	1216.99												53.7834	8.23439	7.67492	2.00021	0.05
				90	1184.1	0	8.38449	1.26193	0			0	0.799904	0.200096	0		54.0165	7.01625	7.86707	2.00371	0.0564512
				80	1145.22	0	16.6084	3.25522	0			0	0.745985	0.254015	0		54.5636	5.58564	7.90929	2.01125	0.0668258
				70	1097.37	0	24.0028	4.99957	1.10527			0	0.720664	0.27801	0.00132668		55.7233	4.03101	7.71705	2.02361	0.082995
				60	1058.5	7.0102	27.2231	1.50414	4.00744			0.345517	0.585937	0.0639592	0.00458616		58.5425	2.91752	6.95402	3.21738	0.117181
				50	998.686	14.4473	28.6204	0	6.73485			0.554203	0.437905	0	0.00789223		62.7508	1.62037	5.01468	5.74403	0.193781
35.75	1.1	QFM - 1	Initial Composition A	100	1212.68												53.783	8.23434	7.67488	2.00021	0.05
				90	1167.58	0	7.85422	0	0	2.19795		0	0.563262	0	0	0.436738	54.3996	6.51446	7.68992	1.99943	0.056577
				80	1128.5	0	16.8354	1.62887	0	1.66217		0	0.687685	0.118183	0	0.194132	54.9343	5.30809	7.74934	2.00459	0.0670894
				70	1086.4	0	23.2027	4.80538	1.74395			0	0.718113	0.27971	0.00217704	0	55.7481	4.00912	7.77318	2.02556	0.0823474
				60	1038.3	5.1016	27.7314	2.31169	4.9673			0.264241	0.62371	0.105451	0.00659763	0	58.5298	2.68412	7.02581	2.84898	0.116888
				50	981.176	12.9763	29.2815	0	7.58147			0.518817	0.47122	0	0.00996307	0	62.7287	1.54171	5.09571	5.17746	0.194126
32.5	1	QFM - 1	Initial Composition A	100	1208.2												53.7827	8.23429	7.67483	2.00021	0.05
				90	1154.34	0	6.01241	0	0	3.64253		0	0.363911	0	0	0.636089	54.5889	6.14033	7.51361	2.00054	0.0566205
				80	1112.45	0	16.1473	0	0	3.95059		0	0.57899	0	0	0.42101	55.4155	4.90816	7.49165	1.99846	0.0670889
				70	1073.55	0	22.64	4.02707	2.38844	0.499907		0	0.707394	0.241091	0.00307598	0.0484391	55.927	3.91879	7.76544	2.0249	0.0818233
				60	1019.69	2.73681	28.0776	3.39275	5.75783	0		0.151074	0.671553	0.16843	0.008944	0	58.3359	2.50575	7.15133	2.44439	0.113921
				50	962.838	11.5621	29.9347	0	8.40186	0		0.481126	0.506494	0	0.0123802	0	62.712	1.4613	5.16162	4.68618	0.195039
29.25	0.9	QFM - 1	Initial Composition A	100	1203.52												53.7876	8.21963	7.67278	2.00022	0.05
				90	1137.4	0	5.15666	0	0	5.02845		0	0.25491	0	0	0.74509	54.8167	5.67997	7.33772	2.00142	0.0575081
				80	1098.34	0	14.689	0	0	5.21501		0	0.476703	0	0	0.523297	55.6475	4.59057	7.28135	1.99945	0.0676559
				70	1053.26	0	23.1777	0.152488	2.93071	3.623		0	0.658654	0.00857256	0.00370547	0.329068	56.8658	3.5297	7.40434	2.00984	0.0812872
				60	999.168	0.560062	28.4891	4.44304	6.59824	0		0.0325355	0.717631	0.237837	0.011997	0	58.2768	2.29673	7.21753	2.12477	0.112354
				50	945.077	10.0752	30.5707	0	9.15018	0		0.437672	0.54723	0	0.0150982	0	62.6073	1.40132	5.265	4.21364	0.194169
26	0.8	QFM - 1	Initial Composition A	100	1199.02												53.782	8.23418	7.67472	2.00021	0.05
				90	1124.27	0	3.16121	0	0	6.37411		0	0.138136	0	0	0.861864	54.9661	5.35702	7.1422	2.00251	0.0575782
				80	1082.4	0	13.6178	0	0	6.43833		0	0.397343	0	0	0.602657	55.9135	4.24778	7.05029	2.00034	0.0689163
				70	1037.55	0	22.0776	0	3.27404	4.66846		0	0.58433	0	0.00413469	0.411535	57.2238	3.25559	7.17325	2.01144	0.0826425
				60	983.727	0	28.1348	3.75042	7.14062	0.8016		0	0.709495	0.204845	0.0135058	0.0721545	58.5137	2.1854	7.11479	2.04632	0.111425
				50	926.912	7.82134	30.7801	1.16106	9.67525	0		0.353462	0.577611	0.0506876	0.0182392	0	62.2802	1.3056	5.31554	3.59115	0.192173
22.75	0.7	QFM - 1	Initial Composition A	100	1194.34												53.7815	8.23411	7.67467	2.0002	0.05
				90	1106.99		2.26645	0	0	7.65552	0		0.0896124	0	0	0.910388	55.1669	4.94491	6.94504	2.00334	0.0586727
				80	1067.83		12.2386	0	0	7.60742	0		0.335579	0	0	0.664421	56.134	3.96073	6.8175	2.00126	0.0700203
				70	1022.65		20.8243	0	3.5547	5.6208	0		0.522855	0	0.00436992	0.472775	57.5524	3.01308	6.92649	2.01349	0.0843241
				60	965.421		27.9765	1.15892	7.62815	2.96208	0		0.670685	0.0603683	0.0139015	0.255045	59.2531	2.00806	6.70861	2.03609	0.111475
				50	923.253		27.6782	4.53199	10.1136	1.49729	6.22969		0.576554	0.253714	0.0275898	0.142142	60.752	1.41273	6.50967	2.08821	0.145352
19.5	0.6	QFM - 1	Initial Composition A	100	1189.3												53.7811	8.23404	7.6746	2.00021	0.05
				90	1090.51		1.05586	0	0	8.89961	0		0.0348491	0	0	0.965151	55.3348	4.58333	6.737	2.00422	0.0594996
				80	1051.59		11.1798	0	0	8.76163	0		0.272071	0	0	0.727929	56.4018	3.65425	6.56094	2.00211	0.0714581
				70	1006.69		19.6964	0	3.92603	6.50824	0		0.455906	0	0.00486484	0.539229	57.9267	2.76529	6.6616	2.01588	0.0861612
				60	955.795		25.6947	0	7.69358	4.86521	1.27523		0.574952	0	0.0134424	0.411606	59.6834	1.94104	6.4628	2.03512	0.108614
				50	919.872		25.42	0.98955	10.1425	4.72048	8.29838		0.533326	0.0487482	0.0220982	0.395828	61.4617	1.49014	6.34238	2.07563	0.131932
16.25	0.5	QFM - 1	Initial Composition A	100	1184.22												53.7806	8.23397	7.67454	2.00021	0.05
				90	1076.15		0		0	9.88432	0		0		0	1	55.4519	4.30785	6.56304	2.00494	0.0602301
				80	1037.12		9.60615		0	9.97606	0		0.214945		0	0.785055	56.6866	3.39531	6.29499	2.0031	0.0726146
				70	992.089		18.2954		4.16663	7.44276	0		0.397572		0.00504213	0.597386	58.2298	2.56132	6.38436	2.01776	0.0875675
				60	950.061		22.1835		7.66709	6.35941	3.74947		0.466452		0.0125849	0.520963	60.0133	1.91558	6.343	2.04314	0.105364
				50	914.036		22.6801		10.1388	6.61822	10.4118		0.445663		0.0201929	0.534144	62.0128	1.48331	6.13427	2.07789	0.125279
13	0.4	QFM - 1	Initial Composition A	100	1179.14												53.7801	8.23389	7.67447	2.0002	0.05
				90	1070.75		0		0	9.91336	0		0		0	1	55.4563	4.29293	6.56286	2.00496	0.0603259
				80	1019.57		8.55785		0	11.235	0		0.173172		0	0.826828	57.099	3.08769	5.97852	2.004	0.0750201
				70	977.42		16.8237		4.40419	8.36912	0		0.343987		0.00517861	0.650834	58.5118	2.37214	6.09813	2.01963	0.0893104
				60	944.301		19.0073		7.5445	7.75819	5.64213		0.376019		0.0114803	0.6125	60.3113	1.88658	6.16939	2.04902	0.103622
				50	908.172		20.0687		10.0931	7.77631	12.0389		0.373003		0.0186614	0.608336	62.3782	1.46442	5.94887	2.08381	0.123831
9.75	0.3	QFM - 1	Initial Composition A	100	1173.87												53.7796	8.23381	7.67439	2.0002	0.05
				90	1066.26		0		0	9.87021	0		0		0	1	55.4459	4.30501	6.57795	2.00493	0.0602853
				80	1003.48		7.07583		0.150312	12.3735	0		0.132353		0.00011877	0.867528	57.4333	2.83668	5.69319	2.00553	0.0768349
				70	967.612		13.8637		4.37102	9.78623	1.45199		0.265419		0.00482103	0.72976	58.8273	2.26534	5.86804	2.02434	0.0892618
				60	937.719		16.0615		7.39866	9.09733	7.19499		0.299303		0.0103805	0.690316	60.6076	1.8459	5.95535	2.05377	0.10257
				50	901.849		17.6717		10.0198	8.86	13.3329		0.311788		0.0171251	0.671087	62.719	1.43968	5.73293	2.0884	0.122998
6.5	0.2	QFM - 1	Initial Composition A	100	1168.4												53.779	8.23373	7.67432	2.0002	0.05
				90	1060.61		0		0	9.89787	0		0		0	1	55.4496	4.28946	6.57952	2.00495	0.060375
				80	985.755		5.87301		0.750189	13.1992	0		0.103254		0.000584947	0.896161	57.804	2.58328	5.44381	2.00868	0.079036
				70	955.813		10.913		4.58248	11.207	3.70038		0.195255		0.0047984	0.799947	59.335	2.13392	5.65052	2.03218	0.0902005
				60	931.86		13.2325		7.02274	10.5392	8.66724		0.231056		0.00891798	0.760026	60.9048	1.80363	5.68589	2.05734	0.102187
				50	916.889		14.9304		7.70496	11.2156	16.1402		0.237652		0.0104654	0.751882	62.9835	1.53282	5.32211	2.08837	0.121478

## Sheet: G49705
Du, D.-H., Tang, M., Li, W., Kay, S.M., and Wang, X.-L., 2022, What drives Fe depletion in calc-alkaline magma differentiation: Insights from Fe isotopes: Geology, https://doi.org/10.1130/G49705.1
